# Supplementary material for: Modelling Atmospheric Mineral Aerosol Chemistry to Predict Heterogeneous Photooxidation of SO 2
Source: Copernicus journal article supplement (doi:10.5194/acp-2017-120), 2017-03-09
Supplement: Supplementary file 1 [file acp-2017-120-supplement.pdf]

## Supporting Information

### Modelling Atmospheric Mineral Aerosol Chemistry to Predict Heterogeneous

#### Photooxidation of SO<sub>2</sub>

Zechen Yu, Myoseon Jang, and Jiyeon Park

5 P.O.Box 116450, Department of Environmental Engineering Sciences, Engineering School of Sustainable Infrastructure and Environment, University of Florida, Gainesville, FL, USA, 32611  
*Correspondence to:* Myoseon Jang ([mjang@ufl.edu](mailto:mjang@ufl.edu))

10 Number of Tables: 1

Number of Figures: 8

## Section 1: Chamber Characterization

The outdoor experiments were conducted using the University of Florida Atmospheric Photochemical Outdoor Reactor (UF-APHOR) dual chambers located on the roof of Black Hall at University of Florida, Gainesville, Florida (latitude/longitude: 29.64185°/-82.347883°). The total volume for the two half-cylinder shaped chamber is 52 m<sup>3</sup> each. The surface to volume ratio is 1.65 m<sup>2</sup> m<sup>-3</sup> for each chamber. The chambers are built with 0.13 mm FEP Teflon film. The meteorological parameters (i.e., temperature, relative humidity, sunlight spectrum and sunlight intensity) are monitored simultaneously both inside and outside the chambers using a hygrometer (CR1000 Measurement and Control System, Campbell Scientific) (temperature and humidity), a fibro-optical portable spectrometer (EPP2000, Stellar Net Inc., USA) (sunlight spectrum) and an ultraviolet radiometer (TUVR, Eppley Laboratory Inc.) (sunlight intensity). In addition, the wall loss rate constants of ozone, SO<sub>2</sub>, H<sub>2</sub>O<sub>2</sub> and HONO were measured via separate experiments. The rate constant of particle loss to the chamber wall was also measured for Arizona Test Dust (ATD) particles as well as the ammonia sulfate inorganic seeded aerosol. The particle loss rate was calculated for every 3 minutes within each particle size bin and then integrated to calculate an average particle loss rate. The typical particle distribution of ATD particles is shown in the Fig. S1.

### Indoor chamber experiment

The indoor chamber experiments were performed in a 2 m<sup>3</sup> Teflon indoor chamber equipped with UV lamps (Wavelength: 280nm – 900 nm) (Solarc Systems Inc., FS40T12/UVB). The RH and the concentration of trace gases and dust particles were controlled to variety specific experimental conditions. During the experiment, the gases were continuously measured directly from the indoor chamber using a gas chromatography-flam ionization detector (HP-5890 GC-FID), a fluorescence TRS analyzer (Teledyne Model 102E), and a chemiluminescence NO/NO<sub>x</sub> analyzer (Teledyne Model T201). The suspend particles were continuously measured by a scanning mobility particle sizer (SMPS, TSI 3080, USA) and an Optical Particle Counter (OPC, TSI 3330, USA). The mass concentration of inorganic iron was measured using a Particle-Into-Liquid Sampler (Applikon, ADISO 2081) combined with Ion Chromatography (Metrohm, 761 Compact IC) (PILS-IC) for every 30 minutes.

### Outdoor chamber experiment

The dual chambers were flushed and cleaned by the air purifier system (GC Series, IQ Air Inc.) for 2 days before each experiment. The background sulfate concentration was measured every time

before experiments. Non-reactive  $\text{CCL}_4$  (400 ppb) was injected into the dual chamber to determine the chamber dilution factor. Due to the chamber dilution, ambient trace gases (i.e.,  $\text{CO}$ ,  $\text{O}_3$ ,  $\text{CH}_4$ ,  $\text{HCHO}$  and volatile organic compounds) outside the chamber are intruded into the chamber. The estimated concentration of background gases are 1.8 ppb  $\text{CH}_4$ , 18 ppb  $\text{HCHO}$ , 6 ppb  $\text{CH}_3\text{CHO}$ , 0.1 ppb isoprene and 1 ppb  $\text{HONO}$ . The measurement procedures of gases and inorganic iron concentration were similar to that of indoor chamber experiments. The particle distribution was measured using the SMPS and the OPC. For measuring the total particle mass concentration, the suspended particles were collected on a 13mm diameter Teflon-coated glass fiber filter (Pall Life Science Pallflex, TX40HI20-WW) for 20 minutes. The filter mass difference was measured using a microbalance (MX5, Mettler Toledo, Columbus, OH). The temperature (T, K) and relative humidity (RH, %) in the dual chamber were monitored using a hygrometer (CR1000 Measurement and Control System, Campbell Scientific). For measuring the wavelength-dependent actinic flux, a fibro-optical portable spectrometer (EPP2000, Stellar Net Inc., USA) and an ultraviolet radiometer (TUVR, Eppley Laboratory Inc.) were used.

Figure S1

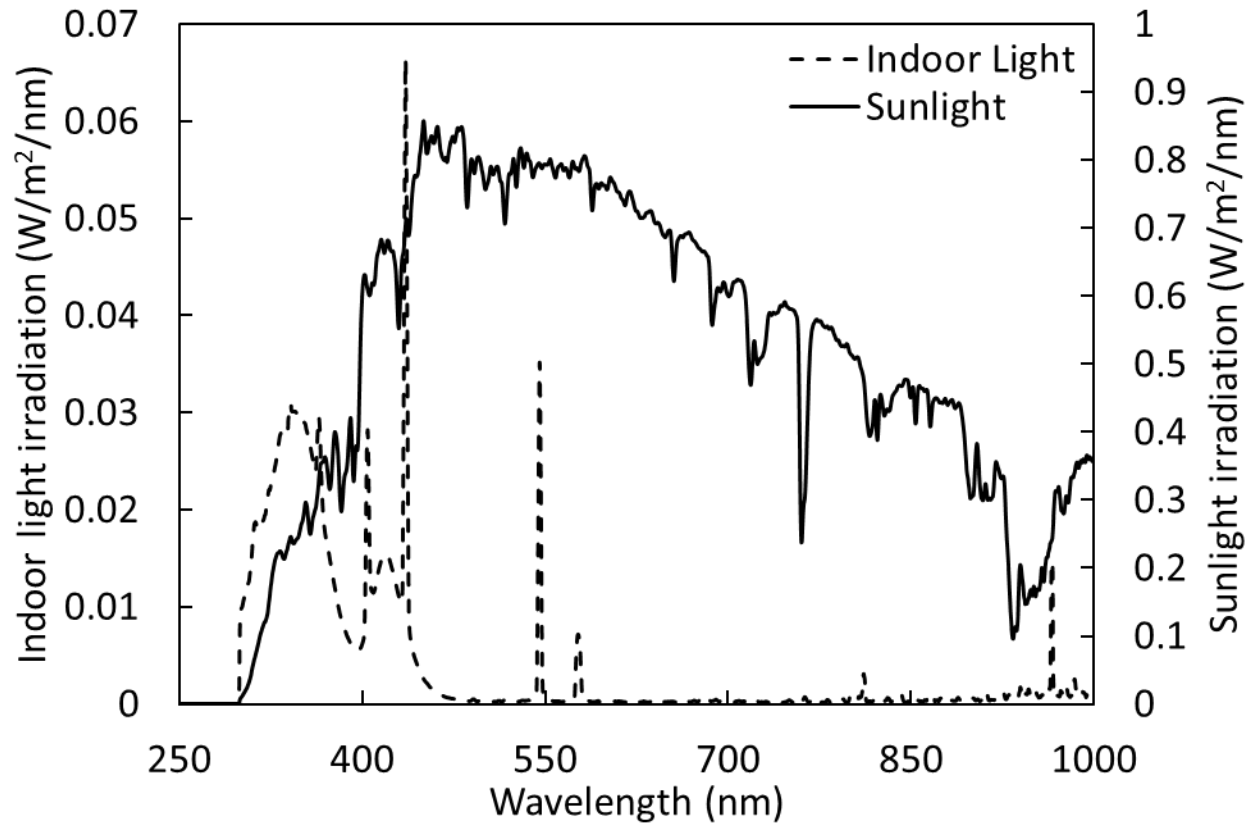

- 5 Figure S1. Light irradiation of the indoor–UV light and the sunlight measured with a fibro–optical portable spectrometer (EPP2000, Stellar Net Inc., USA). The sunlight irradiance was measured on April 20th, 2016 in University of Florida Atmospheric Photochemical Outdoor Reactor, Florida, USA (latitude/longitude: 29.64185°/-82.347883°).

**Figure S2**

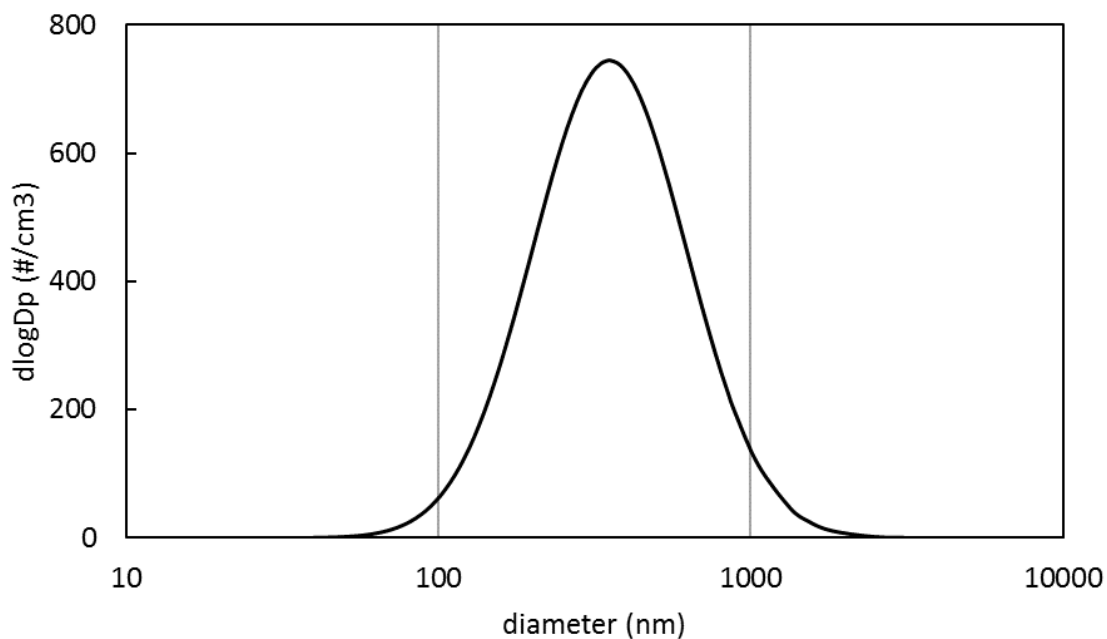

Figure S2. Typical particle size distribution of Arizona Test Dust particles for dust concentration of  $74 \mu\text{g m}^{-3}$  for the experiment on November 22, 2016. The particle number concentration was measured by combining a scanning mobility particle sizer (SMPS, TSI 3080, USA) and an Optical Particle Counter (OPC, TSI 3330, USA) using a Multi-instrument Manager (MIM2<sup>TM</sup>) Software provided by TSI.

**Figure S3**

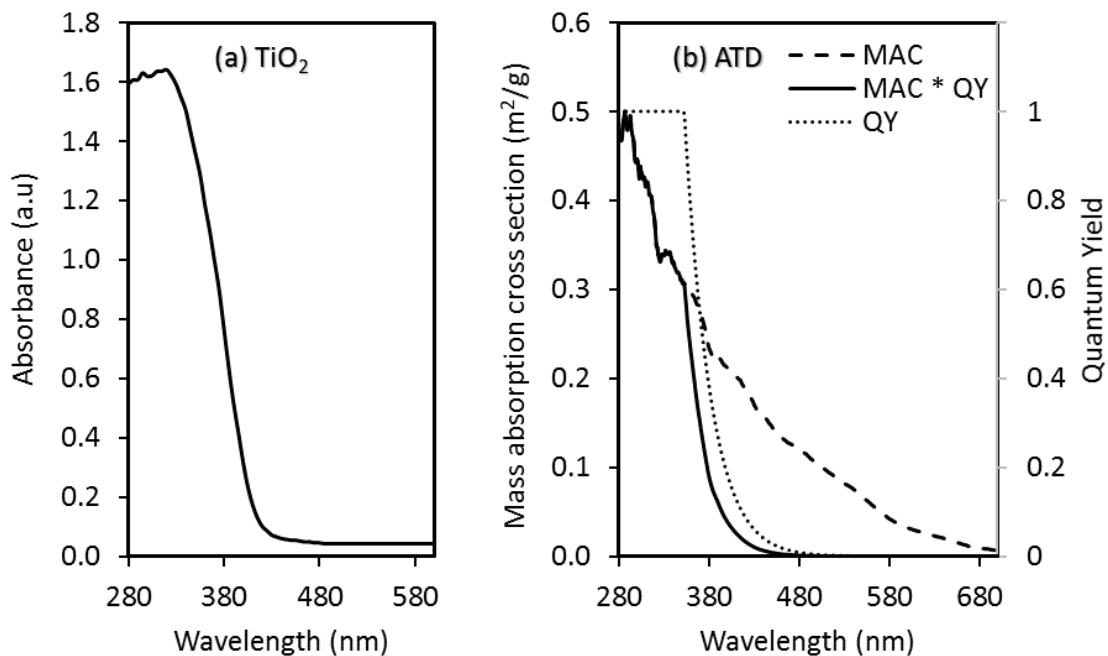

Figure S3. (a) Light absorption of TiO<sub>2</sub> (Reyes–Coronado et al., 2008) (b) The mass absorption cross section (MAC) and the quantum yield (QY) of Arizona Test Dust particles were multiplied to calculate the photocatalytic rate coefficient. The quantum yield of Arizona Test Dust particles was derived from the absorption spectrum of TiO<sub>2</sub>.

**Figure S4**

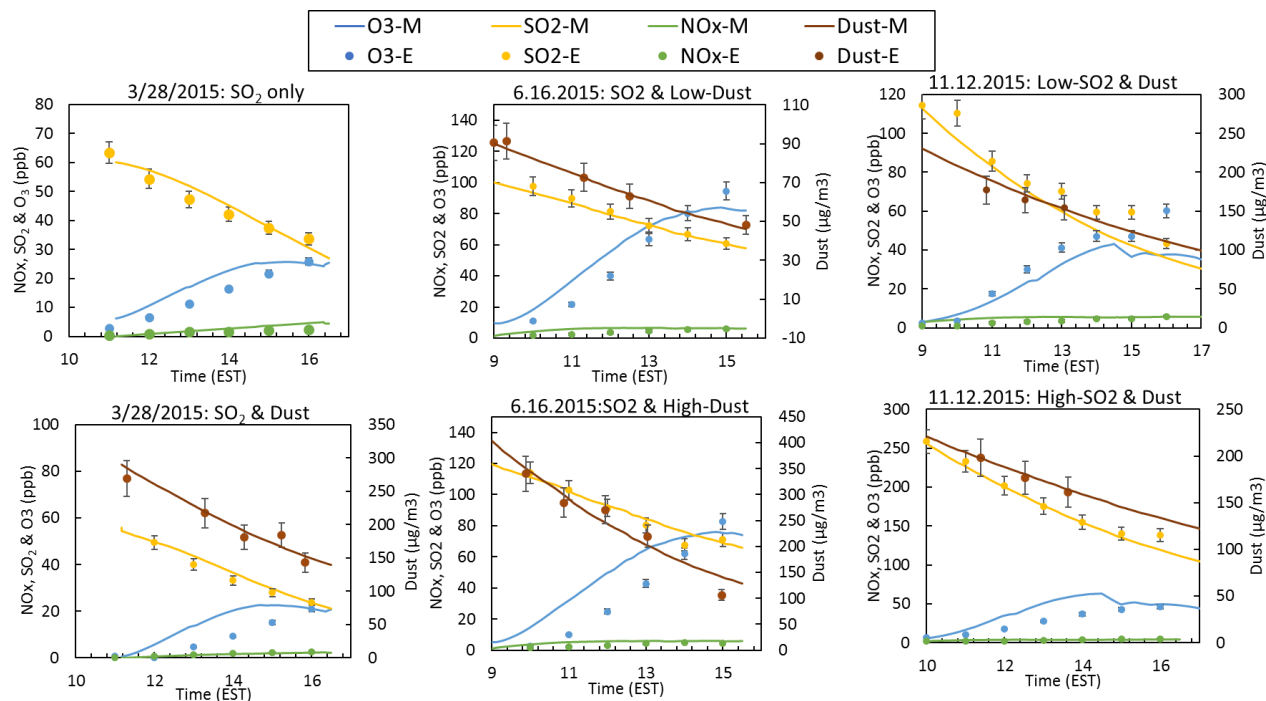

Figure S4. Simulated Ozone, NO<sub>x</sub>, SO<sub>2</sub>, and Dust concentration compare to outdoor experimental observation for Outdoor experiment (3/28/2015, 6/16/2015 and 11/12/2015). “E” denotes the experimentally observation and “M” denotes the model–predicted concentration of trace gases as well as ATD particles. All the simulations included the chamber dilution and the wall process of gaseous compounds and particles. The errors associated with the observation of SO<sub>2</sub>, NO<sub>x</sub>, O<sub>3</sub> and dust particle mass concentration were  $\pm 0.9\%$ ,  $\pm 12.5\%$ ,  $\pm 0.2\%$  and  $\pm 6\%$ , respectively.

Figure S5

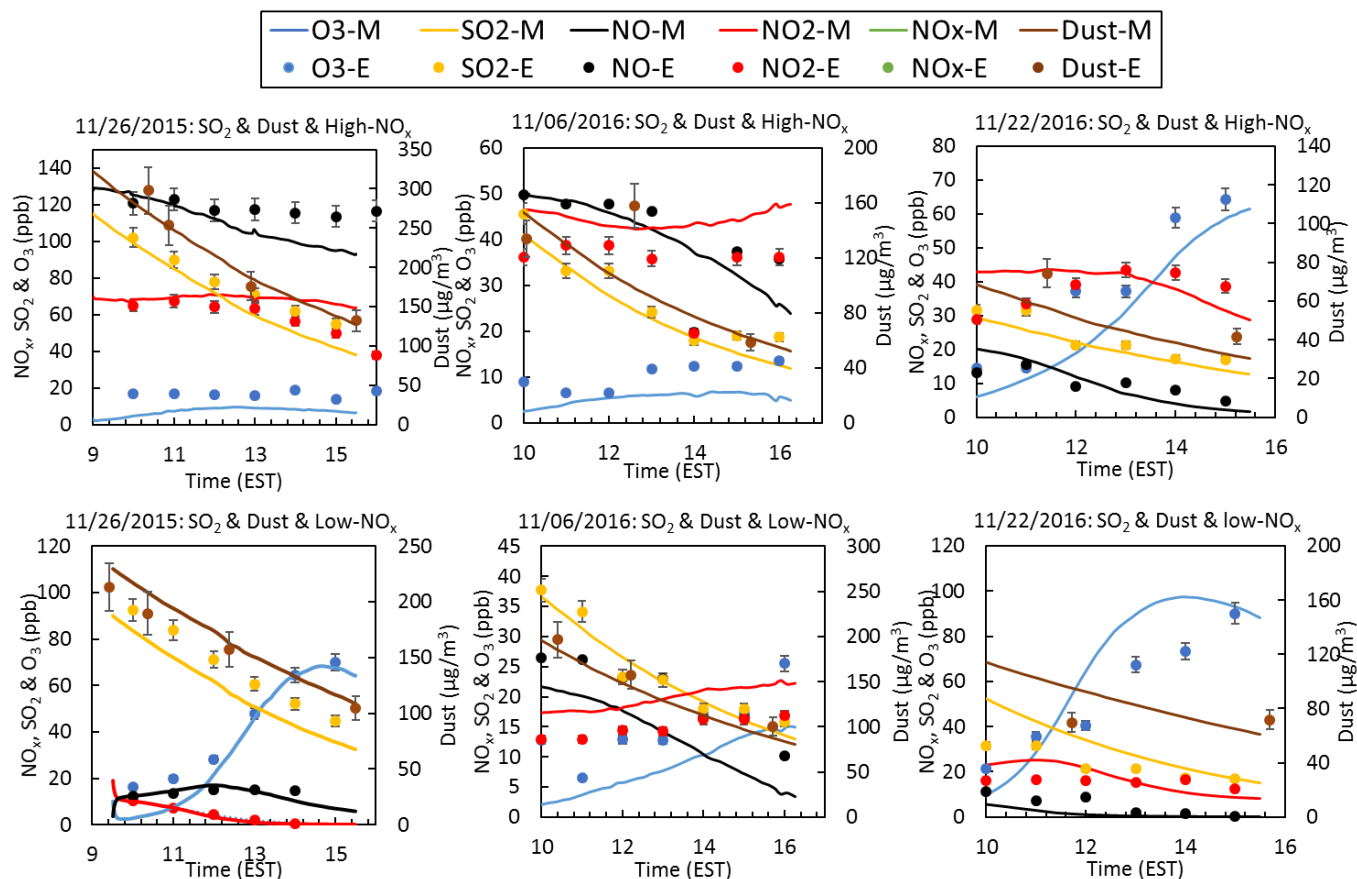

Figure S5. Simulated Ozone, NO<sub>x</sub>, SO<sub>2</sub>, and Dust concentration compare to outdoor experimental observation for Outdoor experiment (5/11/2015 and 11/26/2015). “E” denotes the experimentally observation and “M” denotes the model–predicted concentration of trace gases and ATD particles. All the simulations included the chamber dilution and the wall process of gaseous compounds and particles. The errors associated with the observation of SO<sub>2</sub>, NO, NO<sub>2</sub>, O<sub>3</sub> and dust particle mass concentration were ±0.9%, ±12.5%, ±6.9%, ±0.2% and ±6%, respectively.



**Figure S6**

(a) Total solar UV radiation

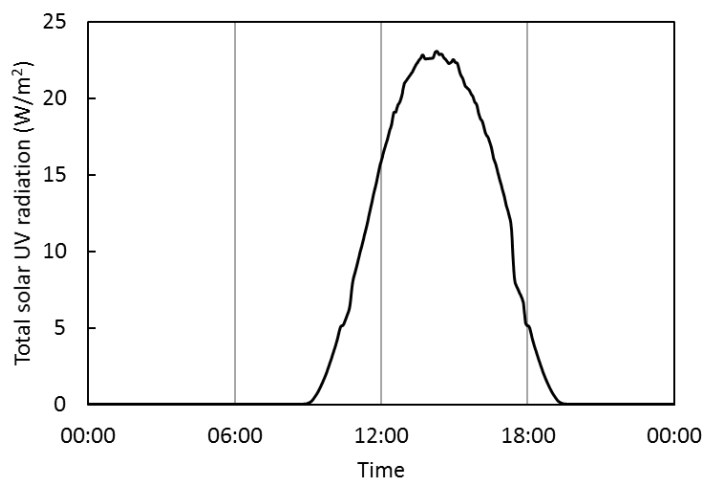

(b) Temperature and humidity

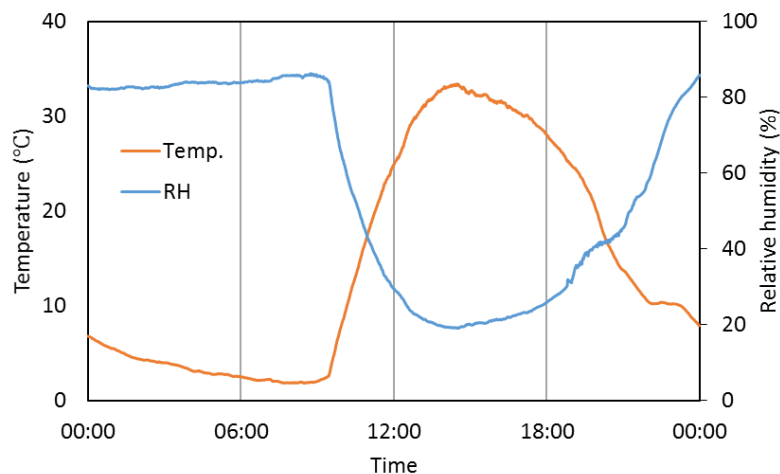

5

Figure S6. Time profile of (a) total solar UV irradiation and (b) temperature and humidity measured on November 22, 2016 at University of Florida Atmospheric Photochemical Outdoor Reactor, Florida, USA (latitude/longitude: 29.64185°/-82.347883°). The total solar short-wave radiation (0.295 to 0.385  $\mu\text{m}$ ) was measured using an ultraviolet radiometer (TUVR, Eppley Laboratory Inc.) inside the chamber. The temperature and humidity are continuously monitored inside the chamber using a hygrometer (CR1000 Measurement and Control System, Campbell Scientific)

Figure S7

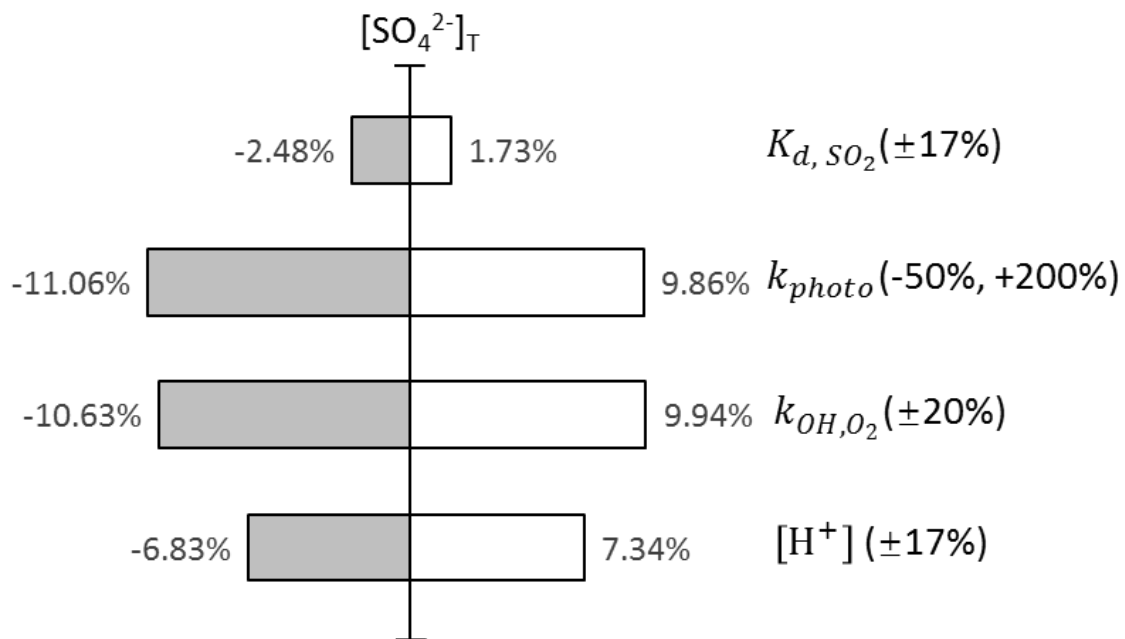

Figure S7. The uncertainty of simulated total sulfate to the variation of selected model parameters. The percent change of the total sulfate was simulated using AMAR model after each parameter was increased or decreased by a factor chosen from the error associated with the parameter. The chamber simulation is conducted with 100 ppb of initial  $SO_2$ , 2 ppb of initial  $NO_2$ , 2 ppb of initial  $O_3$  and  $200 \mu g m^{-3}$  of ATD particles at  $T = 298K$  and  $RH = 40\%$  under ambient sunlight on November 22, 2016.  $NO_x$  (rate of flux =  $2.7 \times 10^6, s^{-1}$ ) and isoprene ( $2.7 \times 10^6, s^{-1}$ ) were constantly added to chamber for the dilution effects. The simulation was performed without considering the particle loss to the chamber wall.

**Figure S8**

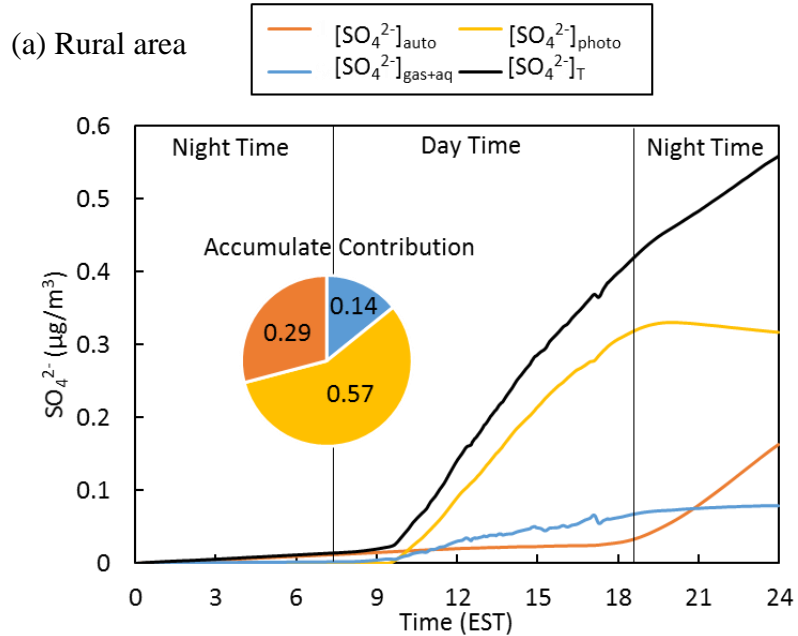

5 (b) Urban area

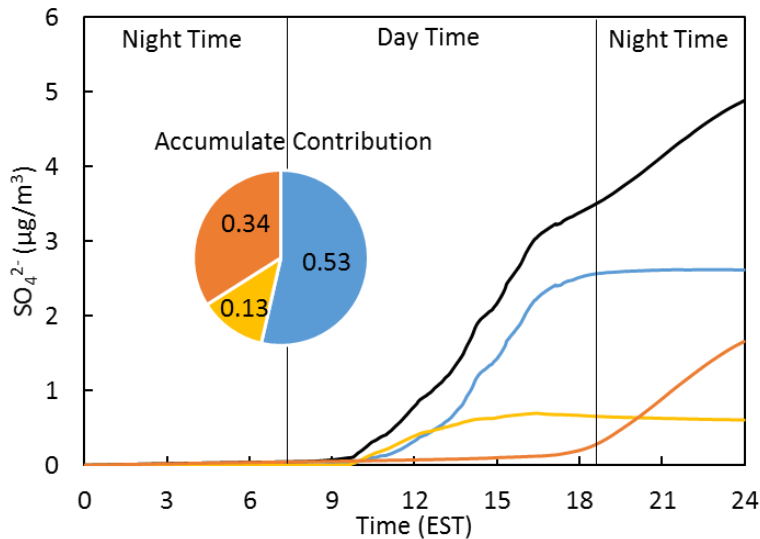

Figure S8. 24 hours simulation of attribution of sulfate formation under the rural (Fig. S8(a)) and polluted urban environment (Fig. S8(b)) using AMAR model. The total sulfate is simulated to show the composition including the sulfate formed from non-dust chemistry ( $[\text{SO}_4^{2-}]_{\text{aq}} + [\text{SO}_4^{2-}]_{\text{gas}}$ ), from dust-phase autoxidation ( $[\text{SO}_4^{2-}]_{\text{auto}}$ ), and from dust photochemistry ( $[\text{SO}_4^{2-}]_{\text{photo}}$ ). The meteorological parameters (i.e., temperature and humidity) are obtained from outdoor chamber experiment (11.22.2016, Table 2). The particle loss to the chamber wall was not considered into the simulation while the dilution process was included.

10 In Fig. S8(a),  $200 \mu\text{g m}^{-3}$  of ATD particles, 2 ppb of initial  $\text{SO}_2$ , 5 ppb of  $\text{NO}_x$  and 20 ppb of isoprene were set for the simulation of rural condition.

15 In Fig. S8(b),  $200 \mu\text{g m}^{-3}$  of ATD particles, 30 ppb of initial  $\text{SO}_2$ , 40 ppb of  $\text{NO}_x$  and 30 ppb of isoprene were set for the simulation of polluted condition.

**Table S1. Chemical mechanism for AMAR model**

| Reaction |                                                                          | Rate constant <sup>a</sup>           | Note                                               |
|----------|--------------------------------------------------------------------------|--------------------------------------|----------------------------------------------------|
|          |                                                                          | gas phase <sup>b</sup>               |                                                    |
| 1        | $O^3P + SO_2 \rightarrow SO_3$                                           | $9.75 \times 10^{-13} \exp(-2280/T)$ | Baulch et al., 1984; Kerr, 1984                    |
| 2        | $HO_2 + SO_2 \rightarrow SO_3 + OH \cdot$                                | $1.00 \times 10^{-18}$               | Atkinson et al., 1989;<br>Atkinson and Lloyd, 1984 |
| 3        | $CH_3-O_2 \cdot + SO_2 \rightarrow SO_3 + CH_3-O \cdot$                  | $5.00 \times 10^{-17}$               | Atkinson et al., 1989;<br>Atkinson and Lloyd, 1984 |
| 4        | $CH_3-O \cdot + SO_2 \rightarrow CH_3-O-SO_2 \cdot$                      | $5.50 \times 10^{-13}$               | Calvert, 1983                                      |
| 5        | $CH_3 \cdot + SO_2 \rightarrow CH_3(O)S(O) \cdot$                        | $2.90 \times 10^{-13}$               | Graedel, 1977                                      |
| 6        | $SO_2 + hv \rightarrow SO_2^*$                                           | $2 \times j[NO_2\_to\_O^3P]$         | Graedel, 1977                                      |
| 7        | $OH \cdot + SO_2 \rightarrow HOSO_2$                                     | $9.07 \times 10^{-13} \exp(231/T)$   | Atkinson et al., 1989; Kerr, 1984                  |
| 8        | $NO_2 + SO_2 \rightarrow NO + SO_3$                                      | $2.00 \times 10^{-26}$               | Sander, 2006                                       |
| 9        | $NO_3 + SO_2 \rightarrow NO_2 + SO_3$                                    | $7.00 \times 10^{-21}$               | Sander, 2006                                       |
| 10       | $CH_3-SO_3 \cdot \rightarrow SO_3 + CH_3 \cdot$                          | $4.00 \times 10^{-2}$                | Chen and Jang, 2012                                |
| 11       | $CH_3-SO_3 \cdot + H-CO-H \rightarrow CH_3-SO_3H + HO_2 \cdot + CO$      | $1.60 \times 10^{-15}$               | Yin et al., 1990                                   |
| 12       | $CH_3-SO_3 \cdot + HO_2 \rightarrow CH_3-SO_3H + O_2$                    | $5.00 \times 10^{-11}$               | Yin et al., 1990                                   |
| 13       | $CH_3-SO_3 \cdot + HONO \rightarrow CH_3-SO_3H + NO_2$                   | $6.60 \times 10^{-16}$               | Yin et al., 1990                                   |
| 14       | $CH_3-SO_3 \cdot + H_2O_2 \rightarrow CH_3-SO_3H + HO_2 \cdot$           | $3.00 \times 10^{-16}$               | Yin et al., 1990                                   |
| 15       | $CH_3-SO_3 \cdot + CH_3-OOH \rightarrow CH_3-SO_3H + CH_3-O_2 \cdot$     | $3.00 \times 10^{-16}$               | Yin et al., 1990                                   |
| 16       | $CH_3-SO_3 \cdot + CH_3-OH \rightarrow CH_3-SO_3H + H-CO-H + HO_2 \cdot$ | $1.00 \times 10^{-16}$               | Yin et al., 1990                                   |
| 17       | $CH_3-SO_3 \cdot + NO_2 \rightarrow CH_3(O)S(O)ONO_2$                    | $3.00 \times 10^{-15}$               | Yin et al., 1990                                   |
| 18       | $CH_3(O)S(O)ONO_2 + H_2O \rightarrow CH_3-SO_3H + HNO_3$                 | $1.00 \times 10^{-15}$               | Yin et al., 1990                                   |
| 19       | $CH_3-SO_3 \cdot + NO \rightarrow CH_3(O)S(O)ONO$                        | $3.00 \times 10^{-15}$               | Yin et al., 1990                                   |
| 20       | $CH_3(O)S(O)ONO + H_2O \rightarrow CH_3-SO_3H + HONO$                    | $1.00 \times 10^{-15}$               | Yin et al., 1990                                   |
| 21       | $CH_3(O)S(O) \cdot + NO_2 \rightarrow CH_3-SO_3 \cdot + NO$              | $5.00 \times 10^{-13}$               | Chen and Jang, 2012                                |
| 22       | $CH_3(O)S(O) \cdot O_3 \rightarrow CH_3-SO_3 \cdot + O_2$                | $5.00 \times 10^{-15}$               | Yin et al., 1990                                   |

**Table S1. (continued)**

|    | Reaction                                                                                                                                                                                            | Rate constant <sup>a</sup>           | Note                           |
|----|-----------------------------------------------------------------------------------------------------------------------------------------------------------------------------------------------------|--------------------------------------|--------------------------------|
| 23 | $\text{CH}_3(\text{O})\text{S}(\text{O})\cdot + \text{HO}_2 \rightarrow \text{CH}_3\text{-SO}_3\cdot + \text{OH}$                                                                                   | $2.50 \times 10^{-13}$               | Yin et al., 1990               |
| 24 | $\text{CH}_3(\text{O})\text{S}(\text{O})\cdot \rightarrow \text{CH}_3\cdot + \text{SO}_2$                                                                                                           | $1.00 \times 10^1$                   | Mellouki et al., 1988          |
| 25 | $\text{CH}_3(\text{O})\text{S}(\text{O})\cdot + \text{O}_2 \rightarrow \text{CH}_3(\text{O})\text{S}(\text{O})\text{OO}\cdot$                                                                       | $2.60 \times 10^{-18}$               | Yin et al., 1990               |
| 26 | $\text{CH}_3(\text{O})\text{S}(\text{O})\text{OO}\cdot \rightarrow \text{CH}_3(\text{O})\text{S}(\text{O})\cdot + \text{O}_2$                                                                       | 3.30                                 | Yin et al., 1990               |
| 27 | $\text{CH}_3(\text{O})\text{S}(\text{O})\cdot + \text{NO}_3 \rightarrow \text{CH}_3\text{-SO}\cdot + \text{NO}_2$                                                                                   | $1.00 \times 10^{-14}$               | Yin et al., 1990               |
| 28 | $\text{CH}_3(\text{O})\text{S}(\text{O})\cdot + \text{CH}_3\text{-O}_2\cdot \rightarrow \text{CH}_3\text{-SO}_3\cdot + \text{CH}_3\text{-O}\cdot$                                                   | $2.50 \times 10^{-13}$               | Yin et al., 1990               |
| 29 | $\text{CH}_3(\text{O})\text{S}(\text{O})\cdot + \text{CH}_3\text{-S}\cdot \rightarrow \text{CH}_3(\text{O})\text{S}(\text{O})\text{S-CH}_3$                                                         | $4.20 \times 10^{-11}$               | Yin et al., 1990               |
| 30 | $\text{CH}_3(\text{O})\text{S}(\text{O})\cdot + \text{CH}_3(\text{O})\text{S}(\text{O})\cdot \rightarrow \text{CH}_3\text{-SO}\cdot + \text{CH}_3\text{-SO}_3\cdot$                                 | $7.50 \times 10^{-12}$               | Yin et al., 1990               |
| 31 | $\text{CH}_3(\text{O})\text{S}(\text{O})\cdot + \text{CH}_3\text{-S-NO}\cdot \rightarrow \text{CH}_3(\text{O})\text{S}(\text{O})\text{CH}_3 + \text{NO}$                                            | $6.80 \times 10^{-13}$               | Yin et al., 1990               |
| 32 | $\text{CH}_3(\text{O})\text{S}(\text{O})\cdot + \text{OH}\cdot \rightarrow \text{CH}_3\text{-SO}_3\text{H}$                                                                                         | $5.00 \times 10^{-11}$               | Yin et al., 1990               |
| 33 | $\text{CH}_3(\text{O})\text{S}(\text{O})\text{OO}\cdot + \text{NO} \rightarrow \text{CH}_3\text{-SO}_3\cdot + \text{NO}_2$                                                                          | $1.00 \times 10^{-11}$               | Yin et al., 1990               |
| 34 | $\text{CH}_3(\text{O})\text{S}(\text{O})\text{OO}\cdot + \text{NO}_2 \rightarrow \text{CH}_3(\text{O})\text{S}(\text{O})\text{OONO}_2$                                                              | $1.00 \times 10^{-12}$               | Yin et al., 1990               |
| 35 | $\text{CH}_3(\text{O})\text{S}(\text{O})\text{OONO}_2 \rightarrow \text{CH}_3(\text{O})\text{S}(\text{O})\text{OO}\cdot + \text{NO}_2$                                                              | $4.20 \times 10^{-03}$               | Yin et al., 1990               |
| 36 | $\text{CH}_3(\text{O})\text{S}(\text{O})\text{OO}\cdot + \text{CH}_3\text{-S}\cdot \rightarrow \text{CH}_3\text{-SO}_3\cdot + \text{CH}_3\text{-SO}\cdot$                                           | $6.00 \times 10^{-11}$               | Yin et al., 1990               |
| 37 | $\text{CH}_3(\text{O})\text{S}(\text{O})\text{OO}\cdot + \text{CH}_3\text{-SO}\cdot \rightarrow \text{CH}_3\text{-SO}_3\cdot + \text{CH}_3(\text{O})\text{S}(\text{O})\cdot$                        | $8.00 \times 10^{-12}$               | Yin et al., 1990               |
| 38 | $\text{CH}_3(\text{O})\text{S}(\text{O})\text{OO}\cdot + \text{CH}_3(\text{O})\text{S}(\text{O})\cdot \rightarrow 2\text{CH}_3\text{-SO}_3\cdot$                                                    | $3.00 \times 10^{-13}$               | Yin et al., 1990               |
| 39 | $\text{CH}_3(\text{O})\text{S}(\text{O})\text{OO}\cdot + \text{HO}_2\cdot \rightarrow \text{CH}_3(\text{O})\text{S}(\text{O})\text{OOH}\cdot + \text{O}_2$                                          | $2.00 \times 10^{-12}$               | Yin et al., 1990               |
| 40 | $\text{CH}_3(\text{O})\text{S}(\text{O})\text{OO}\cdot + \text{CH}_3\text{-O}_2 \rightarrow \text{CH}_3\text{-SO}_3\cdot + \text{CH}_3\text{-O}\cdot + \text{O}_2$                                  | $5.50 \times 10^{-12}$               | Yin et al., 1990               |
| 41 | $\text{CH}_3(\text{O})\text{S}(\text{O})\text{OO}\cdot + \text{CH}_3(\text{O})\text{S}(\text{O})\text{OO}\cdot + \text{CH}_3\text{-SO}\cdot \rightarrow 2\text{CH}_3\text{-SO}_3\cdot + \text{O}_2$ | $6.00 \times 10^{-12}$               | Yin et al., 1990               |
| 42 | $\text{CH}_3(\text{O})\text{S}(\text{O})\text{OO}\cdot + \text{CH}_3\text{-S-OH} \rightarrow \text{CH}_3(\text{O})\text{S}(\text{O})\text{OOH} + \text{CH}_3\text{-SO}\cdot$                        | $4.00 \times 10^{-13}$               | Yin et al., 1990               |
| 43 | $\text{CH}_3\text{-SO}\cdot + \text{O}_2 \rightarrow \text{CH}_3\text{-S}(\text{O})\text{OO}\cdot$                                                                                                  | $7.70 \times 10^{-18}$               | Yin et al., 1990               |
| 44 | $\text{CH}_3\text{-S}(\text{O})\text{OO}\cdot \rightarrow \text{CH}_3\text{-SO}\cdot + \text{O}_2$                                                                                                  | $1.70 \times 10^2$                   | Yin et al., 1990               |
| 45 | $\text{CH}_3\text{-SO}\cdot + \text{NO}_2 \rightarrow \text{CH}_3(\text{O})\text{S}(\text{O})\cdot + \text{NO}$                                                                                     | $6.00 \times 10^{-12}$               | MCM v3.3                       |
| 46 | $\text{CH}_3\text{-SO}\cdot + \text{NO}_2 \rightarrow \text{CH}_3\cdot + \text{NO} + \text{SO}_2$                                                                                                   | $3.00 \times 10^{-12}$               | MCM v3.3                       |
| 47 | $\text{CH}_3\text{-SO}\cdot \rightarrow \text{SO}\cdot + \text{CH}_3\cdot$                                                                                                                          | $2.66 \times 10^{32} \exp(-25200/T)$ | Yin et al., 1990               |
| 48 | $\text{CH}_3\text{-SO}\cdot + \text{NO}_3\cdot \rightarrow \text{CH}_3(\text{O})\text{S}(\text{O})\cdot + \text{NO}_2$                                                                              | $8.00 \times 10^{-12}$               | Yin et al., 1990               |
| 49 | $\text{CH}_3\text{-SO}\cdot + \text{O}_3 \rightarrow \text{CH}_3(\text{O})\text{S}(\text{O})\cdot + \text{O}_2$                                                                                     | $1.00 \times 10^{-12}$               | Tyndall and Ravishankara, 1989 |

**Table S1. (continued)**

|    | Reaction                                                                                                                                                            | Rate constant <sup>a</sup>            | Note                    |
|----|---------------------------------------------------------------------------------------------------------------------------------------------------------------------|---------------------------------------|-------------------------|
| 51 | $\text{CH}_3\text{-SO}\cdot + \text{CH}_3\text{-SO}\cdot \rightarrow \text{CH}_3\text{-SO}\cdot + \text{CH}_3(\text{O})\text{S}(\text{O})\cdot$                     | $7.50 \times 10^{-12}$                | Yin et al., 1990        |
| 50 | $\text{CH}_3\text{-SO}\cdot + \text{HO}_2 \rightarrow \text{CH}_3(\text{O})\text{S}(\text{O})\cdot + \text{OH}$                                                     | $1.50 \times 10^{-12}$                | Yin et al., 1990        |
| 52 | $\text{CH}_3\text{-SO}\cdot + \text{CH}_3\text{-O}_2 \rightarrow \text{CH}_3(\text{O})\text{S}(\text{O})\cdot + \text{CH}_3\text{-O}\cdot$                          | $3.00 \times 10^{-12}$                | Yin et al., 1990        |
| 53 | $\text{CH}_3\text{-SO}\cdot + \text{CH}_3\text{-NO}\cdot \rightarrow \text{CH}_3\text{-S}-(\text{O})\text{CH}_3\cdot + \text{NO}$                                   | $6.80 \times 10^{-13}$                | Yin et al., 1990        |
| 54 | $\text{CH}_3\text{-SO}\cdot + \text{OH}\cdot \rightarrow \text{CH}_3\text{-S}(\text{O})\text{OH}$                                                                   | $5.00 \times 10^{-11}$                | Yin et al., 1990        |
| 55 | $\text{CH}_3\text{-SO}\cdot + \text{O}_3 \rightarrow \text{SO}_2 + \text{CH}_3\text{-O}_2$                                                                          | $3.20 \times 10^{-13}$                | Borissenko et al., 2003 |
| 56 | $\text{CH}_3\text{-S}\cdot + \text{O}_2 \rightarrow \text{CH}_3\text{-SOO}\cdot$                                                                                    | $5.80 \times 10^{-17}$                | Sander, 2006            |
| 57 | $\text{CH}_3\text{-SOO}\cdot \rightarrow \text{CH}_3\text{-S}\cdot + \text{O}_2$                                                                                    | $6.00 \times 10^2$                    | Yin et al., 1990        |
| 58 | $\text{CH}_3\text{-S}\cdot + \text{O}_3 \rightarrow \text{CH}_3\text{-SO}\cdot + \text{O}_2$                                                                        | $5.70 \times 10^{-12}$                | Domine et al., 1992     |
| 59 | $\text{CH}_3\text{-S}\cdot + \text{NO}_2 \rightarrow \text{CH}_3\text{-S-NO}_2\cdot$                                                                                | $6.10 \times 10^{-13}$                | Yin et al., 1990        |
| 60 | $\text{CH}_3\text{-S}\cdot + \text{NO}_2 \rightarrow \text{CH}_3\text{-SO}\cdot + \text{NO}$                                                                        | $6.10 \times 10^{-11}$                | Yin et al., 1990        |
| 61 | $\text{CH}_3\text{-S}\cdot + \text{NO} \rightarrow \text{CH}_3\text{-S-NO}\cdot$                                                                                    | $2.87 \times 10^{-11}$                | Balla et al., 1986      |
| 62 | $\text{CH}_3\text{-S}\cdot + \text{NO}_3 \cdot \rightarrow \text{CH}_3\text{-SO}\cdot \text{NO}_2$                                                                  | $6.40 \times 10^{-11}$                | Yin et al., 1990        |
| 63 | $\text{CH}_3\text{-S}\cdot + \text{HO}_2 \cdot \rightarrow \text{CH}_3\text{-SO}\cdot + \text{OH}$                                                                  | $3.00 \times 10^{-11}$                | Yin et al., 1990        |
| 64 | $\text{CH}_3\text{-S}\cdot + \text{CH}_3\text{-O}_2 \cdot \rightarrow \text{CH}_3\text{-SO}\cdot + \text{CH}_3\text{-O}\cdot$                                       | $6.10 \times 10^{-11}$                | Yin et al., 1990        |
| 65 | $\text{CH}_3\text{-S}\cdot + \text{CH}_3\text{-S}\cdot \rightarrow \text{CH}_3\text{-S-S-CH}_3$                                                                     | $4.15 \times 10^{-11}$                | Graham et al., 1964     |
| 66 | $\text{CH}_3\text{-S}\cdot + \text{CH}_3\text{-S-NO}\cdot \rightarrow \text{CH}_3\text{-S-S-CH}_3 + \text{NO}$                                                      | $1.40 \times 10^{-12}$                | Yin et al., 1990        |
| 67 | $\text{CH}_3\text{-S}\cdot + \text{OH}\cdot \rightarrow \text{CH}_3\text{-S-OH}$                                                                                    | $5.00 \times 10^{-11}$                | Yin et al., 1990        |
| 68 | $\text{CH}_3\text{-S-NO}\cdot + h\nu \rightarrow \text{CH}_3\text{-S}\cdot + \text{NO}$                                                                             | $0.5 \times j[\text{NO}_2\_to\_O^3P]$ | Yin et al., 1990        |
| 69 | $\text{CH}_3\text{-S}\cdot + \text{O}_3 \rightarrow \text{SO}_2 + \text{CH}_3\text{-O}\cdot$                                                                        | $5.70 \times 10^{-12}$                | Domine et al., 1992     |
| 70 | $\text{CH}_3\text{-S}\cdot + \text{CH}_3\text{-S-CH}_3 + (\text{O}_2) \rightarrow \text{CH}_3 + \text{CH}_3\text{-S}(\text{O})\text{CH}_3 + \text{SO}\cdot$         | $8.00 \times 10^{-12}$                | Chen and Jang, 2012     |
| 71 | $\text{CH}_3\text{-S}(\text{O})\text{OH} + \text{OH}\cdot \rightarrow \text{CH}_3(\text{O})\text{S}(\text{O})\cdot + \text{H}_2\text{O}$                            | $1.16 \times 10^{-10}$                | Kukui et al., 2003      |
| 72 | $\text{CH}_3\text{-S}(\text{O})\text{OH} + \text{CH}_3\text{-SO}_3\cdot \rightarrow \text{CH}_3(\text{O})\text{S}(\text{O})\cdot + \text{CH}_3\text{-SO}_3\text{H}$ | $2.00 \times 10^{-13}$                | Yin et al., 1990        |
| 73 | $\text{CH}_3\text{-S}(\text{O})\text{OH} + \text{CH}_3\text{-O}\cdot \rightarrow \text{CH}_3(\text{O})\text{S}(\text{O})\cdot + \text{CH}_3\text{-OH}$              | $1.00 \times 10^{-13}$                | Yin et al., 1990        |
| 74 | $\text{CH}_3\text{-S}(\text{O})\text{OH} + \text{O}^3\text{P} \rightarrow \text{CH}_3(\text{O})\text{S}(\text{O})\cdot + \text{OH}\cdot$                            | $1.00 \times 10^{-13}$                | Yin et al., 1990        |
| 75 | $\text{CH}_3\text{-S}(\text{O})\text{OH} + \text{NO}_3 \rightarrow \text{CH}_3(\text{O})\text{S}(\text{O})\cdot + \text{HNO}_3$                                     | $1.00 \times 10^{-13}$                | Yin et al., 1990        |
| 76 | $\text{CH}_3\text{-S}(\text{O})\text{OH} + \text{HO}_2 \rightarrow \text{CH}_3(\text{O})\text{S}(\text{O})\cdot + \text{H}_2\text{O}_2$                             | $1.00 \times 10^{-15}$                | Yin et al., 1990        |

**Table S1. (continued)**

|                            | Reaction                                                                                                                      | Rate constant <sup>a</sup>                                         | Note                                                             |
|----------------------------|-------------------------------------------------------------------------------------------------------------------------------|--------------------------------------------------------------------|------------------------------------------------------------------|
| 77                         | $\text{CH}_3\text{-S(O)OH} + \text{CH}_3\text{-O}_2\cdot \rightarrow \text{CH}_3\text{(O)S(O)}\cdot + \text{CH}_3\text{-OOH}$ | $1.00 \times 10^{-15}$                                             | Yin et al., 1990                                                 |
| 78                         | $\text{CH}_3\text{-S-S-CH}_3 + \text{OH}\cdot \rightarrow \text{CH}_3\text{-S-OH} + \text{CH}_3\text{-S}\cdot$                | $5.59 \times 10^{-11} \exp(380/T)$                                 | Atkinson et al., 1989                                            |
| 79                         | $\text{CH}_3\text{-S-S-CH}_3 + \text{O}^3\text{P} \rightarrow \text{CH}_3\text{-SO}\cdot + \text{CH}_3\text{-S}\cdot$         | $5.62 \times 10^{-11} \exp(250/T)$                                 | Atkinson et al., 1989; Cvetanovic et al., 1981; Nip et al., 1981 |
| 80                         | $\text{CH}_3\text{-S-S-CH}_3 + \text{NO}_3 \rightarrow \text{CH}_3\text{-S(ONO}_2\text{)S-CH}_3$                              | $7.00 \times 10^{-13}$                                             | Yin et al., 1990                                                 |
| 81                         | $\text{CH}_3\text{-S(ONO}_2\text{)S-CH}_3 \rightarrow \text{CH}_3\text{-S(O)NO}_2\cdot + \text{CH}_3\text{-S}\cdot$           | $1.00 \times 10^2$                                                 | Yin et al., 1990                                                 |
| 82                         | $\text{CH}_3\text{-S-S-CH}_3 + h\nu \rightarrow 2\text{CH}_3\text{-S}\cdot$                                                   | $5.0 \times 10^{-3} \times j[\text{NO}_2\text{\_to\_O}^3\text{P}]$ | Yin et al., 1990                                                 |
| 83                         | $\text{CH}_3\text{-S(O)NO}_2\cdot \rightarrow \text{CH}_3\text{-SO}\cdot + \text{NO}_2$                                       | 1.00                                                               | Yin et al., 1990                                                 |
| 84                         | $\text{SO}_2^* \rightarrow \text{SO}_2$                                                                                       | $3.70 \times 10^6$                                                 | Graedel, 1977                                                    |
| 85                         | $\text{SO}_2^* + \text{SO}_2 \rightarrow \text{SO} + \text{SO}_3$                                                             | $6.30 \times 10^{-13}$                                             | Graedel, 1977                                                    |
| 86                         | $\text{SO}_2^* + \text{CO} \rightarrow \text{SO} + \text{CO}_2$                                                               | $1.10 \times 10^{-14}$                                             | Graedel, 1977                                                    |
| 87                         | $\text{HOSO}_2 + \text{O}_2 \rightarrow \text{HO}_2 + \text{SO}_3$                                                            | $4.00 \times 10^{-13}$                                             | Atkinson et al., 1989; Kerr, 1984                                |
| 88                         | $\text{HOSO}_2 + \text{OH}\cdot + \text{M} \rightarrow \text{H}_2\text{SO}_4 + \text{M}$                                      | $1.00 \times 10^{-11}$                                             | Graedel, 1979                                                    |
| 89                         | $\text{SO}_3 + \text{H}_2\text{O} + \text{M} \rightarrow \text{H}_2\text{SO}_4 + \text{M}$                                    | $9.10 \times 10^{-13}$                                             | Atkinson and Lloyd, 1984; Kerr, 1984                             |
| 90                         | $\text{SO}_3 + \text{O}^3\text{P} \rightarrow \text{SO}_2 + \text{O}_2$                                                       | $7.00 \times 10^{-13}$                                             | Calvert et al., 1978                                             |
| 91                         | $\text{SO}\cdot + \text{O}_2 \rightarrow \text{SO}_2 + \text{O}^3\text{P}\cdot$                                               | $1.39 \times 10^{-13} \exp(-2280/T)$                               | Atkinson et al., 1989                                            |
| 92                         | $\text{SO}\cdot + \text{NO}_2 \rightarrow \text{SO}_2 + \text{NO}$                                                            | $1.40 \times 10^{-11}$                                             | Atkinson et al., 1989                                            |
| 93                         | $\text{SO}\cdot + \text{O}_3 \rightarrow \text{SO}_2 + \text{O}_2$                                                            | $4.51 \times 10^{-12} \exp(-1170/T)$                               | Atkinson et al., 1989                                            |
| 94                         | $\text{SO}\cdot + \text{O}^3\text{P} \rightarrow \text{SO}_2$                                                                 | $2.20 \times 10^{-11}$                                             | Graedel, 1977                                                    |
| 95                         | $\text{SO}\cdot + \text{OH} \rightarrow \text{SO}_2 + \text{HO}_2$                                                            | $1.10 \times 10^{-10}$                                             | Graedel, 1977                                                    |
| 96                         | $\text{SO}\cdot + \text{SO}_3 \rightarrow 2\text{SO}_2$                                                                       | $2.00 \times 10^{-15}$                                             | Graedel, 1977                                                    |
| Aqueous phase <sup>c</sup> |                                                                                                                               |                                                                    |                                                                  |
| 1                          | $\text{OH(aq)} + \text{HO}_2\text{(aq)} \rightarrow \text{H}_2\text{O(aq)} + \text{O}_2\text{(aq)}$                           | $1.01 \times 10^{12} \exp(-1500/T)/V$                              | Sehested et al., 1968; Thomas, 1963                              |
| 2                          | $\text{OH(aq)} + \text{O}_2^- \rightarrow \text{O}_2\text{(aq)} + \text{OH}^-$                                                | $1.30 \times 10^{12} \exp(-1500/T)/V$                              | Buxton et al., 1988                                              |
| 3                          | $\text{HO}_2\text{(aq)} + \text{O}_2^- \rightarrow \text{H}_2\text{O}_2\text{(aq)} + \text{O}_2\text{(aq)} + \text{OH}^-$     | $3.29 \times 10^9 \exp(-1050/T)/V$                                 | Bielski et al., 1985                                             |

**Table S1. (continued)**

|    | Reaction                                                                                                                                      | Rate constant <sup>a</sup>            | Note                                                                                       |
|----|-----------------------------------------------------------------------------------------------------------------------------------------------|---------------------------------------|--------------------------------------------------------------------------------------------|
| 4  | $\text{HO}_2(\text{aq}) + \text{HO}_2(\text{aq}) \rightarrow \text{H}_2\text{O}_2(\text{aq}) + \text{O}_2(\text{aq})$                         | $7.14 \times 10^9 \exp(-2700/T)/V$    | Bielski et al., 1985                                                                       |
| 5  | $\text{OH}(\text{aq}) + \text{H}_2\text{O}_2(\text{aq}) \rightarrow \text{HO}_2(\text{aq}) + \text{H}_2\text{O}(\text{aq})$                   | $8.11 \times 10^9 \exp(-1700/T)/V$    | Christensen et al., 1982;<br>Buxton et al., 1988                                           |
| 6  | $\text{O}_2^- + \text{O}_3(\text{aq}) \rightarrow \text{OH}(\text{aq}) + \text{OH}^- + 2\text{O}_2(\text{aq})$                                | $2.30 \times 10^{11} \exp(-1500/T)/V$ | Sehested et al., 1983;<br>Bielski et al., 1985;                                            |
| 7  | $\text{H}_2\text{O}_2(\text{aq}) + h\nu \rightarrow \text{OH}(\text{aq}) + \text{OH}(\text{aq})$                                              | $j[\text{H}_2\text{O}_2\_to\_OH]$     | Lin et al., 1978; Molina et al., 1981;<br>Nicovich et al., 1988;<br>Vaghjiani et al., 1989 |
| 8  | $\text{OH}(\text{aq}) + \text{HSO}_3^- \rightarrow \text{SO}_5^- + \text{H}_2\text{O}(\text{aq})$                                             | $6.91 \times 10^{11} \exp(-1500/T)/V$ | Huie and Neta, 1987                                                                        |
| 9  | $\text{HSO}_3^- + \text{H}^+ + \text{H}_2\text{O}_2(\text{aq}) \rightarrow \text{SO}_4^{2-} + 2\text{H}^+$                                    | $5.77 \times 10^{14} \exp(-4725/T)/V$ | Hoffmann and Calvert, 1985                                                                 |
| 10 | $\text{SO}_3^{2-} + \text{H}^+ + \text{H}_2\text{O}_2(\text{aq}) \rightarrow \text{SO}_4^{2-} + \text{H}^+$                                   | $5.77 \times 10^{14} \exp(-4725/T)/V$ | Hoffmann and Calvert, 1985                                                                 |
| 11 | $\text{H}_2\text{C}(\text{OH})_2 + \text{OH}(\text{aq}) \rightarrow \text{HO}_2(\text{aq}) + \text{HCOOH}(\text{aq})$                         | $2.21 \times 10^{10} \exp(-1000/T)/V$ | Chin and Wine, 1994                                                                        |
| 12 | $\text{OH}(\text{aq}) + \text{SO}_3^{2-} \rightarrow \text{SO}_5^- + \text{OH}^-$                                                             | $8.44 \times 10^{11} \exp(-1500/T)/V$ | Huie and Neta, 1987; Adams and<br>Boag, 1964; Buxton et al., 1988                          |
| 13 | $\text{HCOO}^- + \text{OH}(\text{aq}) \rightarrow \text{CO}_2 + \text{HO}_2(\text{aq}) + \text{OH}^-$                                         | $2.12 \times 10^{11} \exp(-1250/T)/V$ | Chin and Wine, 1994                                                                        |
| 14 | $\text{HSO}_3^- + \text{H}^+ + \text{CH}_3\text{OOH}(\text{aq}) \rightarrow \text{SO}_4^{2-} + 2\text{H}^+ + \text{CH}_3\text{OH}(\text{aq})$ | $6.13 \times 10^{12} \exp(-3780/T)/V$ | Hoffmann and Calvert, 1985                                                                 |
| 15 | $\text{SO}_3^{2-} + \text{SO}_4^- \rightarrow \text{SO}_4^{2-} + \text{SO}_5^-$                                                               | $1.15 \times 10^{11} \exp(-1500/T)/V$ | Wine et al., 1989                                                                          |
| 16 | $\text{HSO}_3^- + \text{SO}_4^- \rightarrow \text{SO}_4^{2-} + \text{SO}_5^- + \text{H}^+$                                                    | $1.15 \times 10^{11} \exp(-1500/T)/V$ | Wine et al., 1989                                                                          |
| 17 | $\text{HSO}_3^- + \text{H}_2\text{C}(\text{OH})_2 \rightarrow \text{HOCH}_2\text{SO}_3^-$                                                     | $1.01 \times 10^4 \exp(-3000/T)/V$    | Boyce and Hoffmann, 1984                                                                   |
| 18 | $\text{SO}_3^{2-} + \text{H}_2\text{C}(\text{OH})_2 \rightarrow \text{HOCH}_2\text{SO}_3^- + \text{OH}^-$                                     | $5.21 \times 10^7 \exp(-2450/T)/V$    | Boyce and Hoffmann, 1984                                                                   |
| 19 | $\text{HSO}_3^- + \text{O}_3(\text{aq}) \rightarrow \text{SO}_4^{2-} + \text{H}^+$                                                            | $3.83 \times 10^{13} \exp(-5500/T)/V$ | Hoffmann and Calvert, 1985                                                                 |
| 20 | $\text{SO}_3^{2-} + \text{O}_3(\text{aq}) \rightarrow \text{SO}_4^{2-}$                                                                       | $7.43 \times 10^{16} \exp(-5280/T)/V$ | Hoffmann and Calvert, 1985                                                                 |
| 21 | $\text{SO}_4^- + \text{OH}^- \rightarrow \text{SO}_4^{2-} + \text{OH}(\text{aq})$                                                             | $1.23 \times 10^{10} \exp(-1500/T)/V$ | Maruthamuthu and Neta, 1978                                                                |
| 22 | $\text{SO}_4^- + \text{H}_2\text{O}_2(\text{aq}) \rightarrow \text{SO}_4^{2-} + \text{H}^+ + \text{HO}_2(\text{aq})$                          | $9.86 \times 10^9 \exp(-2000/T)/V$    | Wine et al., 1989                                                                          |
| 23 | $\text{SO}_4^- + \text{H}_2\text{O}(\text{aq}) \rightarrow \text{SO}_4^{2-} + \text{H}^+ + \text{OH}(\text{aq})$                              | $2.19 \times 10^5 \exp(-1850/T)/V$    | Bao and Barker, 1996                                                                       |
| 24 | $\text{SO}_4^- \text{HCOO}^- \rightarrow \text{SO}_4^{2-} + \text{CO}_2(\text{aq}) + \text{OH}_2(\text{aq})$                                  | $1.69 \times 10^{10} \exp(-1500/T)/V$ | Wine et al., 1989                                                                          |
| 25 | $\text{CH}_3\text{O}_2(\text{aq}) + \text{O}_2^- \rightarrow \text{CH}_3\text{OOH}(\text{aq}) + \text{OH}^- + \text{O}_2(\text{aq})$          | $1.70 \times 10^9 \exp(-1050/T)/V$    | Jacob, 1986                                                                                |



**Table S1. (continued)**

|    | Reaction                                                                                                                                                                        | Rate constant <sup>a</sup>            | Note                                            |
|----|---------------------------------------------------------------------------------------------------------------------------------------------------------------------------------|---------------------------------------|-------------------------------------------------|
| 26 | $\text{HCOOH}(\text{aq}) + \text{OH}(\text{aq}) \rightarrow \text{H}_2\text{O}(\text{aq}) + \text{CO}_2(\text{aq}) + \text{HO}_2(\text{aq})$                                    | $3.15 \times 10^9 \exp(-1000/T)/V$    | Chin and Wine, 1994                             |
| 27 | $\text{O}_3(\text{aq}) + \text{H}_2\text{O}_2(\text{aq}) + \text{OH}^- \rightarrow \text{OH}(\text{aq}) + \text{O}_2^- + \text{O}_2(\text{aq}) + \text{H}_2\text{O}(\text{aq})$ | $2.97 \times 10^{14} \exp(-4000/T)/V$ | Stahelin and Hoigne, 1982                       |
| 28 | $\text{HOCH}_2\text{SO}_3^- + \text{OH}^- \rightarrow \text{SO}_3^{2-} + \text{H}_2\text{C}(\text{OH})_2$                                                                       | $1.34 \times 10^{10} \exp(-4500/T)/V$ | Deister et al., 1986;<br>Munger et al., 1986    |
| 29 | $\text{CH}_3\text{OOH}(\text{aq}) + \text{OH}(\text{aq}) \rightarrow \text{H}_2\text{C}(\text{OH})_2(\text{aq}) + \text{OH}(\text{aq})$                                         | $9.44 \times 10^9 \exp(-1850/T)/V$    | Jacob, 1986                                     |
| 30 | $\text{CH}_3\text{OOH}(\text{aq}) + \text{OH}(\text{aq}) \rightarrow \text{CH}_3\text{O}_2(\text{aq}) + \text{H}_2\text{O}(\text{aq})$                                          | $8.11 \times 10^9 \exp(-1700/T)/V$    | Jacob, 1986                                     |
| 31 | $\text{HOCH}_2\text{SO}_3^- + \text{OH}(\text{aq}) \rightarrow \text{H}_2\text{C}(\text{OH})_2(\text{aq}) + \text{SO}_5^- + \text{H}^+ + \text{OH}^-$                           | $2.00 \times 10^{11} \exp(-1500/T)/V$ | Martin et al., 1989                             |
| 32 | $\text{SO}_4^- + \text{HO}_2(\text{aq}) \rightarrow \text{SO}_4^{2-} + \text{H}^+ + \text{O}_2(\text{aq})$                                                                      | $7.67 \times 10^{11} \exp(-1500/T)/V$ | Jacob, 1986                                     |
| 33 | $\text{SO}_4^- + \text{O}_2^- \rightarrow \text{SO}_4^{2-} + \text{O}_2(\text{aq})$                                                                                             | $7.67 \times 10^{11} \exp(-1500/T)/V$ | Jacob, 1986                                     |
| 34 | $\text{HCOO}^- + \text{O}_3(\text{aq}) \rightarrow \text{CO}_2(\text{aq}) + \text{OH}(\text{aq}) + \text{O}_2^-$                                                                | $1.04 \times 10^{10} \exp(-5500/T)/V$ | Hoigne and Bader, 1983                          |
| 35 | $\text{SO}_5^- + \text{HCOO}^- \rightarrow \text{HSO}_5^- + \text{CO}_2(\text{aq}) + \text{O}_2^-$                                                                              | $9.45 \times 10^9 \exp(-4000/T)/V$    | Jacob, 1986                                     |
| 36 | $\text{SO}_4^- + \text{NO}_2^- \rightarrow \text{SO}_4^{2-} + \text{NO}_2(\text{aq})$                                                                                           | $1.50 \times 10^{11} \exp(-1500/T)/V$ | Wine et al., 1989                               |
| 37 | $\text{SO}_5^- + \text{HSO}_3^- \rightarrow \text{HSO}_5^- + \text{SO}_5^-$                                                                                                     | $1.02 \times 10^{10} \exp(-3850/T)/V$ | Huie and Neta, 1987                             |
| 38 | $\text{HSO}_5^- + \text{OH}(\text{aq}) \rightarrow \text{SO}_5^- + \text{H}_2\text{O}(\text{aq})$                                                                               | $9.99 \times 10^9 \exp(-1900/T)/V$    | Maruthamuthu and Neta, 1977                     |
| 39 | $\text{HSO}_5^- + \text{HSO}_3^- + \text{H}^+ \rightarrow 2\text{SO}_4^{2-} + 3\text{H}^+$                                                                                      | $1.40 \times 10^{10} \exp(-2000/T)/V$ | McElroy, 1987;<br>Betterton and Hoffmann, 1988a |
| 40 | $\text{SO}_5^- + \text{HSO}_3^- \rightarrow \text{SO}_4^- + \text{SO}_4^{2-} + \text{H}^+$                                                                                      | $9.46 \times 10^9 \exp(-3500/T)/V$    | Huie and Neta, 1987                             |
| 41 | $\text{O}_2^- + \text{SO}_5^- \rightarrow \text{O}_2(\text{aq}) + \text{HSO}_5^- + \text{OH}^-$                                                                                 | $3.39 \times 10^9 \exp(-1050/T)/V$    | Jacob, 1986                                     |
| 42 | $\text{NO}(\text{aq}) + \text{NO}_2(\text{aq}) + \text{H}_2\text{O}(\text{aq}) \rightarrow 2\text{NO}_2^- + 2\text{H}^+$                                                        | $3.07 \times 10^{10} \exp(-1500/T)/V$ | Lee, 1984                                       |
| 43 | $\text{NO}_2(\text{aq}) + \text{NO}_2(\text{aq}) + \text{H}_2\text{O}(\text{aq}) \rightarrow \text{NO}_2^- + 2\text{H}^+ + \text{NO}_3^-$                                       | $1.53 \times 10^{10} \exp(-1500/T)/V$ | Lee, 1984                                       |
| 44 | $\text{NO}_2(\text{aq}) + \text{OH}(\text{aq}) \rightarrow \text{NO}_3^- + \text{H}^+$                                                                                          | $2.00 \times 10^{11} \exp(-1500/T)/V$ | Strehlow and Wagner, 1982                       |
| 45 | $\text{HONO}(\text{aq}) + h\nu \rightarrow \text{OH}(\text{aq}) + \text{NO}(\text{aq})$                                                                                         | $j[\text{HONO\_to\_OH}]$              | Bongartz et al., 1991;<br>Atkinson et al., 1997 |
| 46 | $\text{NO}_2^- + h\nu \rightarrow \text{OH}(\text{aq}) + \text{NO}(\text{aq})$                                                                                                  | $j[\text{HONO\_to\_OH}]$              | Bongartz et al., 1991;<br>Atkinson et al., 1997 |
| 47 | $\text{HONO}(\text{aq}) + \text{OH}(\text{aq}) \rightarrow \text{NO}_2(\text{aq}) + \text{H}_2\text{O}(\text{aq})$                                                              | $1.53 \times 10^{11} \exp(-1500/T)/V$ | Rettich, 1978                                   |
| 48 | $\text{NO}_2^- + \text{OH}(\text{aq}) \rightarrow \text{NO}_2(\text{aq}) + \text{OH}^-$                                                                                         | $1.53 \times 10^{12} \exp(-1500/T)/V$ | Treinin and Hayon, 1970                         |

**Table S1. (continued)**

|                                       | Reaction                                                                                                                                        | Rate constant <sup>a</sup>                                    | Note                                         |
|---------------------------------------|-------------------------------------------------------------------------------------------------------------------------------------------------|---------------------------------------------------------------|----------------------------------------------|
| 49                                    | $\text{HONO}(\text{aq}) + \text{H}_2\text{O}_2(\text{aq}) + \text{H}^+ \rightarrow \text{NO}_3^- + \text{H}_2\text{O}(\text{aq}) + 2\text{H}^+$ | $3.66 \times 10^{13} \exp(-6700/T)/V$                         | Lee and Lind, 1986                           |
| 50                                    | $\text{NO}_2^- + \text{O}_3(\text{aq}) \rightarrow \text{NO}_3^- + \text{O}_2(\text{aq})$                                                       | $6.72 \times 10^{15} \exp(-6950/T)/V$                         | Damschen and Martin, 1983                    |
| Gas-aqueous partitioning <sup>d</sup> |                                                                                                                                                 |                                                               |                                              |
| 1                                     | $\text{SO}_2 \leftrightarrow \text{SO}_2(\text{aq})$                                                                                            | $2.66 \times 10^{-18} \exp(3135/T) \times T/\rho_{\text{in}}$ | Chameides, 1984                              |
| 2                                     | $\text{NO}_2 \leftrightarrow \text{NO}_2(\text{aq})$                                                                                            | $2.34 \times 10^{-18} \exp(1800/T) \times T/\rho_{\text{in}}$ | Chameides, 1984                              |
| 3                                     | $\text{NO} \leftrightarrow \text{NO}(\text{aq})$                                                                                                | $1.02 \times 10^{-18} \exp(1500/T) \times T/\rho_{\text{in}}$ | Schwartz and White, 1981                     |
| 4                                     | $\text{O}_3 \leftrightarrow \text{O}_3(\text{aq})$                                                                                              | $3.07 \times 10^{-19} \exp(2380/T) \times T/\rho_{\text{in}}$ | Chameides, 1984; Jacob, 1986                 |
| 5                                     | $\text{H}_2\text{O}_2 \leftrightarrow \text{H}_2\text{O}_2(\text{aq})$                                                                          | $1.48 \times 10^{-18} \exp(6600/T) \times T/\rho_{\text{in}}$ | Chameides, 1984;<br>O'Sullivan et al., 1996; |
| 6                                     | $\text{HONO} \leftrightarrow \text{HONO}(\text{aq})$                                                                                            | $4.80 \times 10^{-19} \exp(4750/T) \times T/\rho_{\text{in}}$ | Chameides, 1984; Martin, 1984                |
| 7                                     | $\text{HO}_2 \leftrightarrow \text{HO}_2(\text{aq})$                                                                                            | $3.95 \times 10^{-20} \exp(6600/T) \times T/\rho_{\text{in}}$ | Hanson et al., 1992; Jacob, 1986             |
| 8                                     | $\text{OH} \leftrightarrow \text{OH}(\text{aq})$                                                                                                | $4.58 \times 10^{-20} \exp(5250/T) \times T/\rho_{\text{in}}$ | Hanson et al., 1992; Jacob, 1986             |
| 9                                     | $\text{CH}_3\text{O}_2 \leftrightarrow \text{CH}_3\text{O}_2(\text{aq})$                                                                        | $3.39 \times 10^{-21} \exp(5600/T) \times T/\rho_{\text{in}}$ | Jacob, 1986                                  |
| 10                                    | $\text{CH}_3\text{CO}_2\text{H} \leftrightarrow \text{CH}_3\text{CO}_2\text{H}(\text{aq})$                                                      | $3.40 \times 10^{-19} \exp(6400/T) \times T/\rho_{\text{in}}$ | Lind and Kok, 1986                           |
| 11                                    | $\text{HCHO} \leftrightarrow \text{HCHO}(\text{aq})$                                                                                            | $7.79 \times 10^{-24} \exp(7150/T) \times T/\rho_{\text{in}}$ | Chameides, 1984;<br>Zhou and Mopper, 1990    |
| 12                                    | $\text{CH}_3\text{OOH} \leftrightarrow \text{CH}_3\text{OOH}(\text{aq})$                                                                        | $1.24 \times 10^{-19} \exp(5600/T) \times T/\rho_{\text{in}}$ | Lind and Kok, 1986                           |
| 13                                    | $\text{HCOOH} \leftrightarrow \text{HCOOH}(\text{aq})$                                                                                          | $1.46 \times 10^{-18} \exp(5700/T) \times T/\rho_{\text{in}}$ | Jacob, 1986                                  |
| Acid dissociation                     |                                                                                                                                                 |                                                               |                                              |
| 1                                     | $\text{HO}_2(\text{aq}) \leftrightarrow \text{O}_2^- + \text{H}^+$                                                                              | $1.17 \times 10^{-3} \exp(-1046.4/T)$                         | Bielski et al., 1985                         |
| 2                                     | $\text{HCOOH}(\text{aq}) \leftrightarrow \text{HCOO}^- + \text{H}^+$                                                                            | $1.79 \times 10^{-4} \exp(2.4/T)$                             | Sillen et al., 1964                          |
| 3                                     | $\text{HONO}(\text{aq}) \leftrightarrow \text{NO}_2^- + \text{H}^+$                                                                             | $3.07 \times 10^{-4} \exp(151.6/T)$                           | Schwartz and White, 1981                     |
| 4                                     | $\text{SO}_2(\text{aq}) \leftrightarrow \text{HSO}_3^- + \text{H}^+$                                                                            | $2.65 \times 10^{-2} \exp(-235.7/T)$                          | Olson and Hoffmann, 1989                     |
| 5                                     | $\text{HSO}_3^-(\text{aq}) \leftrightarrow \text{SO}_3^{2-} + \text{H}^+$                                                                       | $1.21 \times 10^{-7} \exp(-180.4/T)$                          | Olson and Hoffmann, 1989                     |
| 6                                     | $\text{HCHO}(\text{aq}) \leftrightarrow \text{H}_2\text{C}(\text{OH})_2(\text{aq})$                                                             | $2.08 \times 10^2 \exp(-483.5/T)$                             | Betterton and Hoffmann, 1988b                |

**Table S1. (continued)**

| Reaction                           | Rate constant <sup>a</sup>                                                                    | k <sub>1</sub> | k <sub>2</sub>       | k <sub>3</sub> | Note  |                                                       |
|------------------------------------|-----------------------------------------------------------------------------------------------|----------------|----------------------|----------------|-------|-------------------------------------------------------|
| Gas-dust partitioning <sup>e</sup> |                                                                                               |                |                      |                |       |                                                       |
| 1                                  | SO <sub>2</sub> + Dust → SO <sub>2</sub> (d) + Dust                                           | f              | 1×10 <sup>-8</sup>   |                |       | Adams et al., 2005; Huang et al., 2015                |
| 2                                  | SO <sub>2</sub> (d) → SO <sub>2</sub>                                                         | g              | 2×10 <sup>9</sup>    | 3100           | 0.013 | Adams et al., 2005; Huang et al., 2015                |
| 3                                  | O <sub>3</sub> + Dust → O <sub>3</sub> (d) + Dust                                             | f              | 1×10 <sup>-8</sup>   |                |       | Michel et al. 2003; Underwood et al. 2001             |
| 4                                  | O <sub>3</sub> (d) → O <sub>3</sub>                                                           | h              | 1×10 <sup>10</sup>   | 2700           |       | Michel et al. 2003; Underwood et al. 2001             |
| 5                                  | NO <sub>2</sub> + Dust → NO <sub>2</sub> (d) + Dust                                           | f              | 1×10 <sup>-8</sup>   |                |       | Chameides 1984                                        |
| 6                                  | NO <sub>2</sub> (d) → NO <sub>2</sub>                                                         | h              | 5×10 <sup>8</sup>    | 2500           |       | Chameides 1984                                        |
| 7                                  | HNO <sub>3</sub> + Dust → HNO <sub>3</sub> (d) + Dust                                         | f              | 1×10 <sup>-8</sup>   |                |       | Schwartz and White 1981; Schwartz 1984                |
| 8                                  | HNO <sub>3</sub> (d) → HNO <sub>3</sub>                                                       | g              | 1×10 <sup>15</sup>   | 8700           | 15.4  | Schwartz and White 1981; Schwartz 1984                |
| 9                                  | HONO + Dust → HONO(d) + Dust                                                                  | f              | 1×10 <sup>-8</sup>   |                |       | Becker et al. 1996                                    |
| 10                                 | HONO(d) → HONO                                                                                | g              | 1×10 <sup>10</sup>   | 4900           | 0     | Becker et al. 1996                                    |
| 11                                 | N <sub>2</sub> O <sub>5</sub> + Dust → HNO <sub>3</sub> (d) + Dust                            | f              | 7.3×10 <sup>-3</sup> |                |       | Wagner et al. 2009                                    |
| Dust phase                         |                                                                                               |                |                      |                |       |                                                       |
| 12                                 | Dust + <i>hν</i> → Dust + e <sub>h</sub>                                                      |                | j <sub>[ATD]</sub>   |                |       | estimated                                             |
| 13                                 | e <sub>h</sub> → energy                                                                       | i              | 1×10 <sup>-2</sup>   |                |       | estimated                                             |
| 14                                 | e <sub>h</sub> + O <sub>2</sub> → OH(d)                                                       | j              | 1×10 <sup>-22</sup>  | 2.3            |       | estimated                                             |
| 15                                 | SO <sub>2</sub> (d) → SO <sub>4</sub> <sup>2-</sup> (d)                                       | i              | 5×10 <sup>-6</sup>   |                |       | estimated                                             |
| 16                                 | SO <sub>2</sub> (d) + OH(d) → SO <sub>4</sub> <sup>2-</sup> (d)                               | i              | 1×10 <sup>-12</sup>  |                |       | estimated                                             |
| 17                                 | SO <sub>2</sub> (d) + O <sub>3</sub> (d) → SO <sub>4</sub> <sup>2-</sup> (d) + O <sub>2</sub> | i              | 2×10 <sup>-11</sup>  |                |       | estimated                                             |
| 18                                 | e <sub>h</sub> + O <sub>3</sub> (d) → OH(d) + O <sub>2</sub>                                  | i              | 1×10 <sup>-12</sup>  |                |       | estimated                                             |
| 19                                 | NO <sub>2</sub> (d) → NO <sub>3</sub> <sup>-</sup> (d)                                        | i              | 6×10 <sup>-5</sup>   |                |       | estimated                                             |
| 20                                 | e <sub>h</sub> + NO <sub>2</sub> (d) → HONO(d)                                                | i              | 6×10 <sup>-12</sup>  |                |       | estimated                                             |
| 21                                 | HONO(d) + <i>hν</i> → OH(d) + NO                                                              |                | j <sub>[HONO]</sub>  |                |       | Stockwell and Calvert, 1978;<br>Atkinson et al., 1997 |
| 22                                 | NO <sub>2</sub> (d) + OH(d) → NO <sub>3</sub> <sup>-</sup> (d)                                | i              | 1×10 <sup>-10</sup>  |                |       | estimated                                             |

**Table S1. (continued)**

| Reaction | Rate constant <sup>a</sup>                                                                                | k <sub>1</sub> | k <sub>2</sub>      | k <sub>3</sub> | Note      |
|----------|-----------------------------------------------------------------------------------------------------------|----------------|---------------------|----------------|-----------|
| 23       | $\text{NO}_3^-(\text{d}) + \text{Salt}(\text{d}) \rightarrow \text{NO}_3^-(\text{d\_salt})$               | i              | $1 \times 10^{-8}$  |                | estimated |
| 24       | $\text{SO}_4^{2-}(\text{d}) + \text{Salt}(\text{d}) \rightarrow \text{SO}_4^{2-}(\text{d\_salt})$         | i              | $1 \times 10^{-8}$  |                | estimated |
| 25       | $\text{NO}_3^-(\text{d\_salt}) + \text{SO}_4^{2-}(\text{d}) \rightarrow \text{SO}_4^{2-}(\text{d\_salt})$ | i              | $4 \times 10^{-13}$ |                | estimated |

  

| Reaction | Rate constant <sup>a</sup>                | Note                             |                                                       |
|----------|-------------------------------------------|----------------------------------|-------------------------------------------------------|
|          | Wall loss <sup>k</sup>                    |                                  |                                                       |
| 1        | $\text{SO}_2 \rightarrow$                 | (1.3RH + 3.3) × 10 <sup>-6</sup> | For indoor chamber simulation; measured               |
| 2        | $\text{O}_3 \rightarrow$                  | 7 × 10 <sup>-5</sup>             | For indoor chamber simulation;<br>Chen and Jang, 2012 |
| 3        | $\text{SO}_2 \rightarrow$                 | (0.7RH + 1.7) × 10 <sup>-6</sup> | For outdoor chamber simulation; estimated             |
| 4        | $\text{O}_3 \rightarrow$                  | 3.5 × 10 <sup>-5</sup>           | For outdoor chamber simulation; estimated             |
| 5        | <i>Dust</i> →                             | 1 × 10 <sup>-5</sup>             | Measured                                              |
| 6        | $\text{SO}_4^{2-}(\text{aq}) \rightarrow$ | 5 × 10 <sup>-6</sup>             | Measured                                              |

<sup>a</sup> The unit of reaction rate constants is s<sup>-1</sup> for first-order reactions, cm<sup>3</sup> molecule<sup>-1</sup> s<sup>-1</sup> for second-order reactions and cm<sup>6</sup> molecule<sup>-2</sup> s<sup>-1</sup> for third order reactions. The unit of the rate constants for the dust sorption reactions is m<sup>3</sup> m<sup>-2</sup> s<sup>-1</sup>.

<sup>b</sup> The rate constant parameters of SO<sub>2</sub> oxidation in gas phase are taken from previous studies as shown in note of each reactions and can be also found in Chen and Jang (2012). T (K) is the temperature.

5 <sup>c</sup>  $V = N_A \times V(\text{aq})$ , where  $N_A$  (6.022 × 10<sup>23</sup> molecule mol<sup>-1</sup>) is the Avogadro constant and  $V(\text{aq})$  (L cm<sup>-3</sup>) is the volume concentration of inorganic salt seeded aqueous phase in the air. The unit of the chemical species in the aqueous phase is mole per cm<sup>3</sup> of air for the model simulation. The rate constant parameters of reactions in aqueous phases are updated from previous studies (Liang et al., 1999). The detailed citation of each reactions was shown in the notes. The concentration of  $V(\text{aq})$ , H<sub>2</sub>O(aq), H<sup>+</sup> and OH<sup>-</sup> are calculated using E-AIM II (Clegg et al., 1998; Wexler and Clegg, 2002; Clegg and Wexler, 2011).

10 <sup>d</sup> The partitioning rate constant of gas to the aqueous phase is derived from Henry constant (mol atm<sup>-1</sup>).  $\rho_{\text{in}}$  is the density of the inorganic salt seeded aerosol and is calculated using E-AIM II (Clegg et al., 1998; Wexler and Clegg, 2002; Clegg and Wexler, 2011).

<sup>e</sup> The unit of dust for the model is mass concentration (μg m<sup>-3</sup>). During simulation, the concentration of dust is multiplied by a factor of 2.45 × 10<sup>10</sup> to have same magnitude with other gaseous species.

<sup>f</sup> Rate constant  $k = k_1 \sqrt{8RT/(\pi MW)} f_{dust,M2S} / 4$ , where  $f_{dust,M2S} = 3.066 \times 10^{-6} (m^2 \mu g)$ ,  $R = 8.314$  is the ideal gas constant and  $MW$  is the molecule weight of chemical species.

<sup>g</sup> Rate constant  $k = k_1 \exp\left(-\frac{k_2}{T}\right) / (F_{water}(1 + k_3/[H^+]))$ , where  $F_{water} = \exp(4.4RH) + 3.7\exp(4.4RH) \frac{[NO_3^-]}{[Dust]} + \frac{M_{in,water}}{[Dust]}$ .  $[H^+]$  and  $M_{in,water}$  are the concentration of proton and water in dust phase, respectively, and are dynamically calculated using E-AIM II.

5 (Clegg et al., 1998;Wexler and Clegg, 2002;Clegg and Wexler, 2011).

<sup>h</sup> Rate constant  $k = k_1 \exp(-k_2/T)$ .

<sup>i</sup> Rate constant  $k = k_1$ .

<sup>j</sup> Rate constant  $k = k_1 \exp(k_2)$ .

<sup>k</sup> The wall loss factors for the model simulation are only valid for the indoor and outdoor chambers used this study. The loss factors of  
10 gases and particles may be varied for different chamber systems.

## Reference

- Adams, J. W., Rodriguez, D., and Cox, R. A.: The uptake of SO<sub>2</sub> on Saharan dust: a flow tube study, *Atmos. Chem. Phys.*, 5, 2679–2689, 2005.
- 5 Atkinson, R., and Lloyd, A. C.: Evaluation of kinetic and mechanistic data for modeling of photochemical smog, *J. Phys. Chem. Ref. Data*, 13, 315–444, 1984.
- Atkinson, R., Baulch, D., Cox, R., Hampson Jr, R., Kerr, J., and Troe, J.: Evaluated kinetic and photochemical data for atmospheric chemistry: supplement III. IUPAC subcommittee on gas kinetic data evaluation for atmospheric chemistry, *J. Phys. Chem. Ref. Data*, 18, 881–1097, 10 1989.
- Atkinson, R., Baulch, D., Cox, R., Hampson Jr, R., Kerr, J., Rossi, M., and Troe, J.: Evaluated kinetic and photochemical data for atmospheric chemistry: supplement VI. IUPAC subcommittee on gas kinetic data evaluation for atmospheric chemistry, *J. Phys. Chem. Ref. Data*, 26, 1329–1499, 1997.
- 15 Balla, R. J., Nelson, H., and McDonald, J.: Kinetics of the reaction of CH<sub>3</sub>S with NO, NO<sub>2</sub> and O<sub>2</sub>, *Chem. Phys.*, 109, 101–107, 1986.
- Bao, Z.-C., and Barker, J. R.: Temperature and ionic strength effects on some reactions involving sulfate radical [SO<sub>4</sub><sup>-</sup>(aq)], *J. Phys. Chem.*, 100, 9780–9787, 1996.
- Baulch, D., Cox, R., Hampson Jr, R., Kerr, J., Troe, J., and Watson, R.: Evaluated kinetic and photochemical data for atmospheric chemistry: supplement II. CODATA task group on gas 20 phase chemical kinetics, *J. Phys. Chem. Ref. Data*, 13, 1259–1380, 1984.
- Becker, K. H., Kleffmann, J., Kurtenbach, R., and Wiesen, P.: Solubility of nitrous acid (HONO) in sulfuric acid solutions, *J. Phys. Chem.*, 100, 14984–14990, 1996.
- Betterton, E. A., and Hoffmann, M. R.: Henry's law constants of some environmentally 25 important aldehydes, *Environ. Sci. Technol.*, 22, 1415–1418, 1988a.
- Betterton, E. A., and Hoffmann, M. R.: Oxidation of aqueous sulfur dioxide by peroxymonosulfate, *J. Phys. Chem.*, 92, 5962–5965, 1988b.
- Bielski, B. H., Cabelli, D. E., Arudi, R. L., and Ross, A. B.: Reactivity of HO<sub>2</sub>/O<sub>2</sub><sup>-</sup> radicals in aqueous solution, *J. Phys. Chem. Ref. Data*, 14, 1041–1100, 1985.
- 30 Bongartz, A., Kames, J., Welter, F., and Schurath, U.: Near-UV absorption cross sections and trans/cis equilibrium of nitrous acid, *J. Phys. Chem.*, 95, 1076–1082, 1991.
- Borissenko, D., Kukui, A., Laverdet, G., and Le Bras, G.: Experimental study of SO<sub>2</sub> formation in the reactions of CH<sub>3</sub>SO radical with NO<sub>2</sub> and O<sub>3</sub> in relation with the atmospheric oxidation mechanism of dimethyl sulfide, *J. Phys. Chem. A*, 107, 1155–1161, 2003.
- 35 Boyce, S. D., and Hoffmann, M. R.: Kinetics and mechanism of the formation of hydroxymethanesulfonic acid at low pH, *J. Phys. Chem.*, 88, 4740–4746, 1984.
- Buxton, G. V., Greenstock, C. L., Helman, W. P., and Ross, A. B.: Critical review of rate constants for reactions of hydrated electrons, hydrogen atoms and hydroxyl radicals (·OH/·O<sup>-</sup> in aqueous solution, *J. Phys. Chem. Ref. Data*, 17, 513–886, 1988.
- 40 Calvert, J. G., Su, F., Bottenheim, J. W., and Strausz, O. P.: Mechanism of the homogeneous oxidation of sulfur dioxide in the troposphere, *Atmos. Environ.*, 12, 197–226, 1978.
- Calvert, J. G., and Stockwell, W.: Mechanism and rates of the gas phase oxidations of sulfur dioxide and the nitrogen oxides in the atmosphere, Ohio State Univ., Columbus (USA). Dept. of Chemistry, 1983.

- Chameides, W. L.: The photochemistry of a remote marine stratiform cloud, *J. Geophys. Res. Atmos.*, 89, 4739–4755, 1984.
- Chen, T., and Jang, M.: Chamber simulation of photooxidation of dimethyl sulfide and isoprene in the presence of NO<sub>x</sub>, *Atmos. Chem. Phys.*, 12, 10257–10269, 2012.
- 5 Chin, M., and Wine, P.: A temperature–dependent competitive kinetics study of the aqueous–phase reactions of OH radicals with formate, formic acid, acetate, acetic acid, and hydrated formaldehyde, *Aquatic and Surface Photochemistry*, 85–96, 1994.
- Christensen, H., Sehested, K., and Corfitzen, H.: Reactions of hydroxyl radicals with hydrogen peroxide at ambient and elevated temperatures, *J. Phys. Chem.*, 86, 1588–1590, 1982.
- 10 Clegg, S., and Wexler, A. S.: Densities and Apparent Molar Volumes of Atmospherically Important Electrolyte Solutions. 2. The Systems H<sup>+</sup>–HSO<sub>4</sub><sup>–</sup>–SO<sub>4</sub><sup>2–</sup>–H<sub>2</sub>O from 0 to 3 mol kg<sup>–1</sup> as a Function of Temperature and H<sup>+</sup>–NH<sub>4</sub><sup>+</sup>–HSO<sub>4</sub><sup>–</sup>–SO<sub>4</sub><sup>2–</sup>–H<sub>2</sub>O from 0 to 6 mol kg<sup>–1</sup> at 25° C Using a Pitzer Ion Interaction Model, and NH<sub>4</sub>HSO<sub>4</sub>–H<sub>2</sub>O and (NH<sub>4</sub>)<sub>3</sub>H(SO<sub>4</sub>)<sup>2–</sup>–H<sub>2</sub>O over the Entire Concentration Range, *J. Phys. Chem. A*, 115, 3461–3474, 2011.
- 15 Clegg, S. L., Brimblecombe, P., and Wexler, A. S.: Thermodynamic model of the system H<sup>+</sup>–NH<sub>4</sub><sup>+</sup>–SO<sub>4</sub><sup>2–</sup>–NO<sub>3</sub><sup>–</sup>–H<sub>2</sub>O at tropospheric temperatures, *J. Phys. Chem. A*, 102, 2137–2154, 1998.
- Cvetanovic, R., Singleton, D., and Irwin, R.: Gas–phase reactions of O (<sup>3</sup>P) atoms with methanethiol, ethanethiol, methyl sulfide, and dimethyl disulfide. 2. Reaction products and mechanisms, *J. Am. Chem. Soc.*, 103, 3530–3539, 1981.
- 20 Damschen, D. E., and Martin, L. R.: Aqueous aerosol oxidation of nitrous acid by O<sub>2</sub>, O<sub>3</sub> and H<sub>2</sub>O<sub>2</sub>, *Atmos. Environ.*, 17, 2005–2011, 1983.
- Deister, U., Neeb, R., Helas, G., and Warneck, P.: Temperature dependence of the equilibrium CH<sub>2</sub>(OH)<sub>2</sub>+HSO<sub>3</sub><sup>–</sup>=CH<sub>2</sub>(OH)SO<sub>3</sub><sup>–</sup>+H<sub>2</sub>O in aqueous solution, *J. Phys. Chem.*, 90, 3213–3217, 1986.
- 25 Domine, F., Ravishankara, A., and Howard, C. J.: Kinetics and mechanisms of the reactions of methylthio, methylsulfinyl, and methylthio radicals with ozone at 300 K and low pressures, *J. Phys. Chem.*, 96, 2171–2178, 1992.
- 30 Graedel, T.: The homogeneous chemistry of atmospheric sulfur, *Rev. Geophys.*, 15, 421–428, 1977.
- Graedel, T.: Reduced sulfur emission from the open oceans, *Geophys. Res. Lett.*, 6, 329–331, 1979.
- Graham, D., Mieville, R., Pallen, R., and Sivertz, C.: Photo–initiated reactions of thiols and olefins: II. The addition of methanethiol to unconjugated olefins, *Can. J. Chem.*, 42, 2250–2255, 1964.
- 35 Hanson, D. R., Burkholder, J. B., Howard, C. J., and Ravishankara, A.: Measurement of hydroxyl and hydroperoxy radical uptake coefficients on water and sulfuric acid surfaces, *J. Phys. Chem.*, 96, 4979–4985, 1992.
- 40 Hoffmann, M., and Calvert, J.: The aqueous phase chemistry, in: *Chemical Transformation Modules for Eulerian Acid Deposition Models*, National Center for Atmospheric Research Boulder, CO, 147–189, 1985.
- Hoigné, J., and Bader, H.: Rate constants of reactions of ozone with organic and inorganic compounds in water—I: non–dissociating organic compounds, *Water Res.*, 17, 173–183, 45 1983.

- Huang, L. B., Zhao, Y., Li, H., and Chen, Z. M.: Kinetics of heterogeneous reaction of sulfur dioxide on authentic mineral dust: effects of relative humidity and hydrogen peroxide, *Environ. Sci. Technol.*, 49, 10797–10805, 10.1021/acs.est.5b03930, 2015.
- Huie, R. E., and Neta, P.: Rate constants for some oxidations of S (IV) by radicals in aqueous solutions, *Atmos. Environ.*, 21, 1743–1747, 1987.
- Jacob, D. J.: Chemistry of OH in remote clouds and its role in the production of formic acid and peroxymonosulfate, *J. Geophys. Res. Atmos.*, 91, 9807–9826, 1986.
- Kerr, J., and Calvert, J.: Chemical Transformation Modules for Eulerian Acid Decomposition Models, Volume I: The gas-phase chemistry, Boulder, Colorado, 1984.
- Kukui, A., Borissenko, D., Laverdet, G., and Le Bras, G.: Gas-phase reactions of OH radicals with dimethyl sulfoxide and methane sulfinic acid using turbulent flow reactor and chemical ionization mass spectrometry, *J. Phys. Chem. A*, 107, 5732–5742, 2003.
- Lee, Y.-N.: Atmospheric aqueous-phase reactions of nitrogen species, Brookhaven National Lab., Upton, NY (USA), 1984.
- Liang, J. Y., and Jacobson, M. Z.: A study of sulfur dioxide oxidation pathways over a range of liquid water contents, pH values, and temperatures, *J. Geophys. Res. Atmos.*, 104, 13749–13769, doi:10.1029/1999jd900097, 1999.
- Lin, C., Rohatgi, N., and DeMore, W.: Ultraviolet absorption cross sections of hydrogen peroxide, *Geophys. Res. Lett.*, 5, 113–115, 1978.
- Lind, J. A., and Kok, G. L.: Henry's law determinations for aqueous solutions of hydrogen peroxide, methylhydroperoxide, and peroxyacetic acid, *J. Geophys. Res. Atmos.*, 91, 7889–7895, 1986.
- Martin, L., Easton, M., Foster, J., and Hill, M.: Oxidation of hydroxymethanesulfonic acid by Fenton's reagent, *Atmos. Environ.*, 23, 563–568, 1989.
- Maruthamuthu, P., and Neta, P.: Phosphate radicals. Spectra, acid–base equilibriums, and reactions with inorganic compounds, *J. Phys. Chem.*, 82, 710–713, 1978.
- McElroy, W.: An Experimental Study of the Reactions of Some Salts of Oxy–sulphur Acids and Reduced Sulphur Compounds with Strong Oxidants ( $O_3$ ,  $H_2O_2$  and  $HSO_5$ ), Central Electricity Generating Board (CEGB) Technology Planning and Research Division, 1987.
- Mellouki, A., Jourdain, J., and Le Bras, G.: Discharge flow study of the  $CH_3S + NO_2$  reaction mechanism using  $Cl + CH_3SH$  as the  $CH_3S$  source, *Chem. Phys. Lett.*, 148, 231–236, 1988.
- Michel, A. E., Usher, C. R., and Grassian, V. H.: Reactive uptake of ozone on mineral oxides and mineral dusts, *Atmos Environ*, 37, 3201–3211, 10.1016/S1352–2310(03)00319–4, 2003.
- Molina, L. T., and Molina, M. J.: UV absorption cross sections of  $HO_2NO_2$  vapor, *J. Photochem.*, 15, 97–108, 1981.
- Munger, J. W., Tiller, C., and Hoffmann, M. R.: Identification of hydroxymethanesulfonate in fog water, *Science*, 231, 247–250, 1986.
- Nicovich, J., and Wine, P.: Temperature - dependent absorption cross sections for hydrogen peroxide vapor, *J. Geophys. Res. Atmos.*, 93, 2417–2421, 1988.
- Nip, W., Singleton, D., and Cvetanovic, R.: Gas-phase reactions of  $O(^3P)$  atoms with methanethiol, ethanethiol, methyl sulfide, and dimethyl disulfide. 1. Rate constants and Arrhenius parameters, *J. Am. Chem. Soc.*, 103, 3526–3530, 1981.
- O'Sullivan, D. W., Lee, M., Noone, B. C., and Heikes, B. G.: Henry's law constant determinations for hydrogen peroxide, methyl hydroperoxide, hydroxymethyl hydroperoxide, ethyl hydroperoxide, and peroxyacetic acid, *J. Phys. Chem.*, 100, 3241–3247, 1996.



- Olson, T. M., and Hoffmann, M. R.: Hydroxyalkylsulfonate formation: its role as a S (IV) reservoir in atmospheric water droplets, *Atmos. Environ.*, 23, 985–997, 1989.
- Rettich, T. R.: Some photochemical reactions of aqueous nitrous acid, *Diss. Abstr. Int. B*, 38, 5968, 1978.
- 5 Sander, S. P., Friedl, R., Golden, D., Kurylo, M., Moortgat, G., Wine, P., Ravishankara, A., Kolb, C., Molina, M., and Finlayson–Pitts, B.: Chemical kinetics and photochemical data for use in atmospheric studies evaluation number 15, 2006.
- Schwartz, S., and White, W.: Solubility equilibria of the nitrogen oxides and oxyacids in dilute aqueous solution, *Adv. Environ. Sci. Eng.*; (United States), 4, 1981.
- 10 Schwartz, S. E.: Gas–Phase and Aqueous–Phase Chemistry of HO<sub>2</sub> in Liquid Water Clouds, *J. Geophys. Res. Atmos.*, 89, 1589–1598, doi:10.1029/JD089iD07p11589, 1984.
- Sehested, K., Rasmussen, O. L., and Fricke, H.: Rate constants of OH with HO<sub>2</sub>, O<sub>2</sub><sup>-</sup>, and H<sub>2</sub>O<sub>2</sub><sup>+</sup> from hydrogen peroxide formation in pulse–irradiated oxygenated water, *J. Phys. Chem.*, 72, 626–631, 1968.
- 15 Sehested, K., Holcman, J., and Hart, E. J.: Rate constants and products of the reactions of e–aq, dioxide (1–)(O<sub>2</sub><sup>-</sup>) and proton with ozone in aqueous solutions, *J. Phys. Chem.*, 87, 1951–1954, 1983.
- Sillen, L. G., Martell, A. E., and Bjerrum, J.: Stability constants of metal–ion complexes, Chemical Society London, 1964.
- 20 Staehelin, J., and Hoigne, J.: Decomposition of ozone in water: rate of initiation by hydroxide ions and hydrogen peroxide, *Environ. Sci. Technol.*, 16, 676–681, 1982.
- Strehlow, H., and Wagner, I.: Flash photolysis in aqueous nitrite solutions, *Zeitschrift für Physikalische Chemie*, 132, 151–160, 1982.
- Thomas, J.: The rate constants for H atom reactions in aqueous solutions, *J. Phys. Chem.*, 67, 2593–2595, 1963.
- 25 Treinin, A., and Hayon, E.: Absorption spectra and reaction kinetics of NO<sub>2</sub>, N<sub>2</sub>O<sub>3</sub>, and N<sub>2</sub>O<sub>4</sub> in aqueous solution, *J. Am. Chem. Soc.*, 92, 5821–5828, 1970.
- Tyndall, G., and Ravishankara, A.: Kinetics of the reaction of the methylthio radical with ozone at 298 K, *J. Phys. Chem.*, 93, 4707–4710, 1989.
- 30 Underwood, G. M., Song, C. H., Phadnis, M., Carmichael, G. R., and Grassian, V. H.: Heterogeneous reactions of NO<sub>2</sub> and HNO<sub>3</sub> on oxides and mineral dust: A combined laboratory and modeling study, *J. Geophys. Res. Atmos.*, 106, 18055–18066, doi:10.1029/2000jd900552, 2001.
- Vaghjiani, G. L., and Ravishankara, A.: Absorption cross sections of CH<sub>3</sub>OOH, H<sub>2</sub>O<sub>2</sub>, and D<sub>2</sub>O<sub>2</sub> vapors between 210 and 365 nm at 297 K, *J. Geophys. Res. Atmos.*, 94, 3487–3492, 1989.
- 35 Wagner, C., Schuster, G., and Crowley, J.: An aerosol flow tube study of the interaction of N<sub>2</sub>O<sub>5</sub> with calcite, Arizona dust and quartz, *Atmos. Environ.*, 43, 5001–5008, 2009.
- Wexler, A. S., and Clegg, S. L.: Atmospheric aerosol models for systems including the ions H<sup>+</sup>, NH<sub>4</sub><sup>+</sup>, Na<sup>+</sup>, SO<sub>4</sub><sup>2-</sup>, NO<sub>3</sub><sup>-</sup>, Cl<sup>-</sup>, Br<sup>-</sup>, and H<sub>2</sub>O, *J. Geophys. Res. Atmos.*, 107, 2002.
- 40 Wine, P., Tang, Y., Thorn, R., Wells, J., and Davis, D.: Kinetics of aqueous phase reactions of the SO<sub>4</sub><sup>-</sup> radical with potential importance in cloud chemistry, *J. Geophys. Res. Atmos.*, 94, 1085–1094, 1989.
- Yin, F., Grosjean, D., and Seinfeld, J. H.: Photooxidation of dimethyl sulfide and dimethyl disulfide. I: Mechanism development, *J. Atmos. Chem.*, 11, 309–364, 1990.

Zhou, X., and Mopper, K.: Apparent partition coefficients of 15 carbonyl compounds between air and seawater and between air and freshwater; implications for air–sea exchange, *Environ. Sci. Technol.*, 24, 1864–1869, 1990.
